# Supplementary material for: Silver catalyzed cascade cyclization of 2-(allyloxy)arylaldehydes: synthesis of chroman-4-one derivatives
Source: Royal Society of Chemistry journal article supplement (doi:10.1039/d5ob01745a), 2026-01-01

# Silver catalyzed cascade cyclization of 2-(allyloxy)arylaldehydes: synthesis of chroman-4-one derivatives

Jing Zhao†, Wenbin Guo†, Mei Fang, Xuwen Li, Guangjie Wu, Liping Wang\*

† These two authors contributed equally to this work.

Jiangxi Science and Technology Normal University, Nanchang 330013, China

\*E-mail: wlping92@163.com

## Supporting Information

### Table of Contents

|                                                                                                                |       |
|----------------------------------------------------------------------------------------------------------------|-------|
| I. General methods and materials.....                                                                          | SI-2  |
| II. Synthesis of substrates.....                                                                               | SI-2  |
| III. General procedures for the reaction of 2-(allyloxy)benzaldehyde with different alcohols and ketones ..... | SI-2  |
| IV. Additional experiments .....                                                                               | SI-2  |
| V. Characterization of the products .....                                                                      | SI-3  |
| VI. References.....                                                                                            | SI-9  |
| VII. NMR Charts .....                                                                                          | SI-10 |

## I. General methods and materials

All reactions involving air and moisture-sensitive reagents were carried out under an argon atmosphere.  $^1\text{H}$  NMR and  $^{13}\text{C}$  NMR spectra were recorded on a Bruker Advance 400 spectrometer (400 MHz or 600 MHz for  $^1\text{H}$  NMR, 100 MHz or 150 MHz for  $^{13}\text{C}$  NMR) in  $\text{CDCl}_3$  (with TMS as internal standard). Chemical shifts ( $\delta$ ) were measured in ppm. Coupling constants  $J$  were reported in hertz. High resolution mass spectra were obtained on a high-resolution mass spectrometer MALDI-TOF. The starting materials were purchased from Energy Chemical or J & K scientific and used without further purification. Solvents were dried and purified according to the procedure from “*Purification of Laboratory Chemicals book*”. The crude products were purified by flash column chromatography on silica gel and the reported yields are the actual isolated yields of pure products.

## II. Synthesis of substrates

The substrates of various 2-(allyloxy) benzaldehydes in Table 2 (**1a-1i**) and Table 3 (**1a-1f**) were synthesized according to the procedures described in previous literatures <sup>[1]</sup>. The different alcohols (**2a-2i**) in Table 2 and the different ketones (**4a-4d**) in Table 3 were purchased as standard products, a magnetic stirrer was added into a 160 mL flask. Then, DMF (15 mL), salicylaldehyde (342  $\mu\text{L}$ , 32.75 mmol) and  $\text{K}_2\text{CO}_3$  (4.98 g, 36.03 mmol) were added into this reaction. After that, 3-bromopropene (3.05 mL, 36.03 mmol) was added dropwise in an ice-bath. After the dropwise addition was completed, the reaction mixture was warmed to room temperature and it was reacted for 15 h, which was monitored by TLC until it was completed. Then a saturated  $\text{NH}_4\text{Cl}$  solution was added dropwise to quench the reaction system, which was washed with 200 mL of a saturated NaCl solution followed by extracted twice with ethyl acetate. The organic phase was dried with anhydrous sodium sulfate then concentrated under reduced pressure to remove the organic solvent. The crude product was separated and purified by silica gel on column chromatography (ethyl acetate/petroleum ether (v: v) = 1:50) to obtain a colorless oily liquid (5.42 g, yield 98%).

## III. General procedures for the reaction of 2-(allyloxy)benzaldehyde with different alcohols and ketones

In a Schlenk tube equipped with a magnetic stir bar, 2-(allyloxy)benzaldehyde (0.3 mmol), silver carbonate ( $\text{Ag}_2\text{CO}_3$ ) (0.6 mmol, 2 equivalents), and potassium persulfate ( $\text{K}_2\text{S}_2\text{O}_8$ ) (0.6 mmol) were added successively. then the Schlenk tube was purged with argon and perform evacuation three times in sequence. Then,  $\text{EtOH}/\text{H}_2\text{O}$  (3 mL, v: v = 5:1) mixture were added subsequently via syringe. The reaction mixture was stirred in an oil bath at 80  $^\circ\text{C}$  under an argon atmosphere. Similarly, for the reaction with ketone, acetone/ $\text{H}_2\text{O}$  (3 mL, v: v = 1:1) mixture were added and stirred in an oil bath at 80  $^\circ\text{C}$  under an argon atmosphere until the substrate was consumed (monitored by TLC, 8-10 h). The reaction was quenched with saturated sodium sulfite solution (20 mL). The mixture was washed with a saturated NaCl solution (200 mL) and then extracted twice with ethyl acetate. The combined organic phases were dried over anhydrous sodium sulfate, concentrated under reduced pressure to remove the solvent, and purified by silica gel column chromatography to afford the corresponding chroman-4-one derivatives.

## IV. Additional experiments

Under the optimal reaction conditions, three radical scavengers, TEMPO, 1,1-diphenylethylene and BHT, were separately added to the reaction system for radical trapping experiments. The research results showed that when 1 equivalent of TEMPO was additionally added to the reaction system, the radical cascade cyclization was inhibited, the yield of the desired product **3a** was dropped to 26%, and 60% of the starting material was recovered. When the amount of TEMPO increased to 2 equivalents, the reaction was almost completely inhibited and the product **3a** was obtained only in 6% yield. When 1 equivalent of 1,1-diphenylethylene was added to the reaction system, the inhibitory effect was not as good as that of TEMPO. The product **3a** was still formed in 30% yield, but only 50% of the starting material was recovered. Then, it was monitored by thin-layer chromatography (TLC), a product spot with an  $R_f$  value of 0.85 was found in the reaction system. It was speculated that the product might be trapped by 1,1-diphenylethylene. When 1 equivalent of BHT was added to the reaction system, the reaction was also inhibited, and the yield of product **3a** decreased significantly to 10%. The

above-mentioned results indicate that the reaction system might proceed through the generation of radical intermediates.

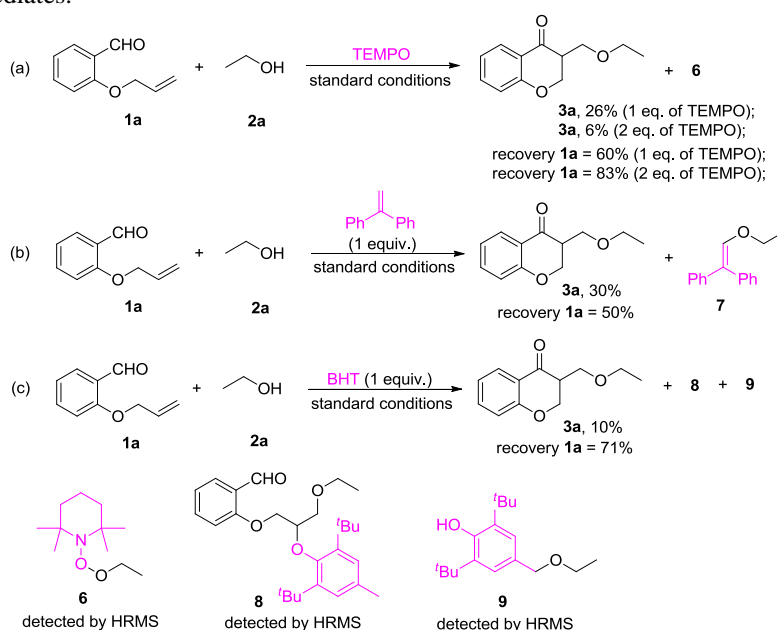

## V. Characterization of the products

### 3a

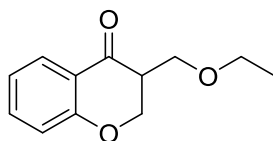

The crude product was separated and purified by silica gel on column chromatography (eluent: petroleum ether/ethyl acetate = 5:1), obtaining colorless oily liquid **3a** (37.10 mg) with a reaction yield of 68%.  $^1\text{H}$  NMR (400 MHz,  $\text{CDCl}_3$ )  $\delta$ : 7.96 (d,  $J$  = 1.8 Hz, 1H), 7.56 (d,  $J$  = 10.8 Hz, 1H), 7.08-7.03 (m, 2H), 4.67-4.61 (m, 1H), 4.38-4.31 (m, 1H), 4.03 (d,  $J$  = 8.0 Hz, 1H), 3.81-3.75 (m, 1H), 3.11-3.03 (m, 1H), 2.13-2.01 (m, 1H), 1.63-1.57 (m, 1H), 1.30 (t,  $J$  = 7.8 Hz, 3H) ppm;  $^{13}\text{C}$  NMR (100 MHz,  $\text{CDCl}_3$ )  $\delta$ : 195.55 (d,  $J$  = 55.0 Hz), 161.68 (d,  $J$  = 9.2 Hz), 136.08 (d,  $J$  = 6.8 Hz), 127.49 (d,  $J$  = 7.6 Hz), 121.43 (d,  $J$  = 5.5 Hz), 120.48 (d,  $J$  = 17.4 Hz), 117.75 (d,  $J$  = 3.2 Hz), 71.05 (d,  $J$  = 57.4 Hz), 66.10 (d,  $J$  = 22.4 Hz), 43.61 (d,  $J$  = 73.7 Hz), 35.51 (d,  $J$  = 10.4 Hz), 24.02 (d,  $J$  = 49.0 Hz) ppm; HRMS(ESI):  $m/z$  Calcd for  $\text{C}_{12}\text{H}_{14}\text{O}_3$  [ $\text{M}+\text{H}^+$ ]: 207.1021, found 207.1027.

### 3b

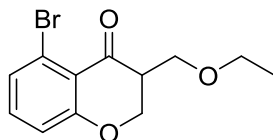

The crude product was separated and purified via silica gel on column chromatography, eluting with petroleum ether/ethyl acetate (5:1) to obtain colorless oily liquid **3b** (32.38 mg) with a reaction yield of 41%.  $^1\text{H}$  NMR (600 MHz,  $\text{CDCl}_3$ )  $\delta$ : 7.84-7.81 (m, 1H), 7.42-7.39 (m, 1H), 6.96-6.88 (m, 1H), 4.53-4.50 (m, 1H), 4.24-4.17 (m, 1H), 3.91-3.88 (m, 1H), 2.94-2.89 (m, 1H), 2.00-1.96 (m, 1H), 1.89-1.85 (m, 1H), 1.49-1.44 (m, 1H), 1.16 (d,  $J$  = 6.18 Hz, 3H) ppm;  $^{13}\text{C}$  NMR (150 MHz,  $\text{CDCl}_3$ )  $\delta$ : 194.62 (d,  $J$  = 88.7 Hz), 160.64 (d,  $J$  = 15.9 Hz), 135.10 (d,  $J$  = 11.7 Hz), 126.47 (d,  $J$  = 11.9 Hz), 120.48, 119.41 (d,  $J$  = 27.0 Hz), 116.73 (d,  $J$  = 6.45 Hz), 69.70 (d,  $J$  = 86.4 Hz), 65.08 (d,  $J$  = 45.3 Hz), 42.58 (d,  $J$  = 122.5 Hz), 34.46 (d,  $J$  = 13.5 Hz), 23.00 (d,  $J$  = 80.7 Hz) ppm; HRMS (ESI):  $m/z$  Calcd for  $\text{C}_{12}\text{H}_{13}\text{BrO}_3$  [ $\text{M}+\text{H}^+$ ]: 285.0126, found 285.0024.

**3c**

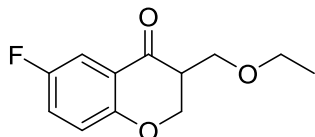

The crude product was separated and purified via silica gel on column chromatography, eluting with petroleum ether/ethyl acetate (5:1) to obtain colorless oily liquid **3c** (35.63 mg) with a reaction yield of 53%. <sup>1</sup>H NMR (400 MHz, CDCl<sub>3</sub>) δ: 7.59-7.61 (m, 1H), 7.24-7.29 (m, 1H), 7.01 (dd, *J* = 4.1 Hz, *J* = 9.0 Hz, 1H), 4.57-4.67 (m, 1H), 4.28-4.37 (m, 1H), 4.00-4.04 (m, 1H), 3.78 (dd, *J* = 7.0 Hz, *J* = 14.0 Hz, 1H), 2.99-3.10 (m, 1H), 1.96-2.12 (m, 1H), 1.61-1.64 (m, 1H), 1.30 (t, *J* = 4.9 Hz, 3H) ppm; <sup>13</sup>C NMR (100 MHz, CDCl<sub>3</sub>) δ: 194.76 (d, *J* = 52.7 Hz), 158.44, 123.68 (d, *J* = 23.9 Hz), 119.44, 112.47 (d, *J* = 6.2 Hz), 112.24 (d, *J* = 6.1 Hz), 71.19 (d, *J* = 62.3 Hz), 66.06, 43.39 (d, *J* = 56.0 Hz), 35.33 (d, *J* = 17.2 Hz), 24.10 (d, *J* = 38.7 Hz) ppm; <sup>19</sup>F NMR (564 MHz, CDCl<sub>3</sub>) δ: -121.36 (s, 1F) ppm. HRMS(ESI): *m/z* Calcd for C<sub>12</sub>H<sub>13</sub>FO<sub>3</sub> [M+H<sup>+</sup>]: 227.0984, found 227.1058.

**3d**

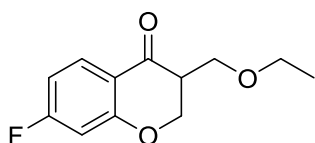

The crude product was separated and purified via silica gel on column chromatography, eluting with petroleum ether/ethyl acetate (5:1) to obtain colorless oily liquid **3d** (37.65 mg) with a reaction yield of 56%. <sup>1</sup>H NMR (400 MHz, CDCl<sub>3</sub>) δ: 7.94-7.90 (m, 1H), 6.74 (t, *J* = 8.0 Hz, 1H), 6.66 (d, *J* = 9.8 Hz, 1H), 4.64-4.54 (m, 1H), 4.34-4.25 (m, 1H), 3.97 (t, *J* = 3.2 Hz, 1H), 3.02-2.96 (m, 1H), 2.08-1.91 (m, 1H), 1.56-1.50 (m, 1H), 1.42 (t, *J* = 7.0 Hz, 1H), 1.27 (t, *J* = 6.2 Hz, 3H) ppm; <sup>13</sup>C NMR (100 MHz, CDCl<sub>3</sub>) δ: 194.05 (d, *J* = 51.9 Hz), 166.27 (t, *J* = 254.9 Hz), 130.09 (d, *J* = 11.2 Hz), 117.42 (d, *J* = 15.1 Hz), 109.94 (d, *J* = 22.5 Hz), 104.48 (d, *J* = 24.4 Hz), 71.51 (d, *J* = 59.2 Hz), 66.09 (d, *J* = 9.11 Hz), 43.31 (d, *J* = 61.0 Hz), 35.36 (d, *J* = 14.8 Hz), 24.09 (d, *J* = 41.7 Hz) ppm; <sup>19</sup>F NMR (564 MHz, CDCl<sub>3</sub>) δ: -100.21 (d, *J* = 8.46 Hz, 1F) ppm. HRMS (ESI): *m/z* Calcd for C<sub>12</sub>H<sub>13</sub>FO<sub>3</sub> [M+H<sup>+</sup>]: 225.0927, found 225.0941.

**3e**

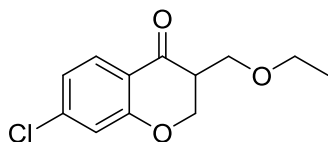

The crude product was separated and purified via silica gel on column chromatography, eluting with petroleum ether/ethyl acetate (5:1) to obtain colorless oily liquid **3e** (37.45 mg) with a reaction yield of 52%. <sup>1</sup>H NMR (600 MHz, CDCl<sub>3</sub>) δ: 7.75 - 7.73 (m, 1H), 6.90 (s, 2H), 4.55-4.53 (m, 1H), 4.24-4.18 (m, 1H), 3.88 (s, 1H), 2.94-2.88 (m, 1H), 1.98-1.94 (m, 1H), 1.88-1.86 (m, 1H), 1.46-1.45 (m, 1H), 1.21-1.15 (m, 3H) ppm; <sup>13</sup>C NMR (150 MHz, CDCl<sub>3</sub>) δ: 193.46 (d, *J* = 80.7 Hz), 160.95 (d, *J* = 12.3 Hz), 140.93 (d, *J* = 11.6 Hz), 127.69 (d, *J* = 8.9 Hz), 121.44 (d, *J* = 8.3 Hz), 117.99 (d, *J* = 26.9 Hz), 116.87 (d, *J* = 4.2 Hz), 70.29 (d, *J* = 94.4 Hz), 65.05, 42.36 (d, *J* = 88.8 Hz), 34.26 (d, *J* = 16.3 Hz), 28.67, 23.06 (d, *J* = 61.7 Hz) ppm; HRMS (ESI): *m/z* Calcd for C<sub>12</sub>H<sub>13</sub>ClO<sub>3</sub> [M+H<sup>+</sup>]: 241.0631, found 241.0620.

**3f**

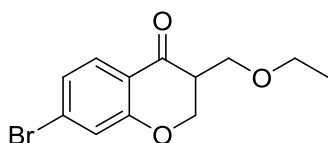

The crude product was separated and purified via silica gel on column chromatography, eluting with petroleum ether/ethyl acetate (5:1) to obtain colorless oily liquid **3f** (40.90 mg) with a reaction yield of 48%. <sup>1</sup>H NMR (600 MHz, CDCl<sub>3</sub>) δ: 7.67 (s, 1H), 7.12 (d, *J* = 7.8 Hz, 2H),

4.56-4.53 (m, 1H), 4.25-4.18 (m, 1H), 3.90-3.88 (m, 1H), 2.92-2.88 (m, 1H), 1.99-1.95 (m, 1H), 1.54 (d,  $J = 13.2$  Hz, 1H), 1.46-1.42 (m, 1H), 1.17 (t,  $J = 6.6$  Hz, 3H) ppm;  $^{13}\text{C}$  NMR (150 MHz,  $\text{CDCl}_3$ )  $\delta$ : 193.32, 160.79, 129.49 (d,  $J = 9.5$  Hz), 127.67, 124.06, 119.96, 118.26, 65.06 (d,  $J = 8.13$  Hz), 42.12, 34.33, 28.68, 22.87 ppm; HRMS (ESI):  $m/z$  Calcd for  $\text{C}_{12}\text{H}_{13}\text{BrO}_3$   $[\text{M}+\text{H}^+]$ : 287.0107, found 287.0128.

### 3g

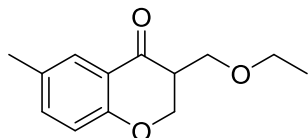

The crude product was separated and purified via silica gel on column chromatography, eluting with petroleum ether/ethyl acetate (5:1) to obtain colorless oily liquid **3g** (36.98 mg) with a reaction yield of 56%.  $^1\text{H}$  NMR (400 MHz,  $\text{CDCl}_3$ )  $\delta$ : 7.69 (s, 1H), 7.29 (t,  $J = 8.4$  Hz, 1H), 6.87 (d,  $J = 8.3$  Hz, 1H), 4.58-4.20 (m, 1H), 4.30-4.20 (m, 1H), 3.97 (s, 1H), 2.97-2.94 (m, 1H), 2.31 (s, 3H), 2.08-1.88 (m, 1H), 1.58-1.53 (m, 1H), 1.43 (t,  $J = 7.0$  Hz, 1H), 1.27 (t,  $J = 6.3$  Hz, 3H) ppm;  $^{13}\text{C}$  NMR (100 MHz,  $\text{CDCl}_3$ )  $\delta$ : 194.63, 185.64, 136.27, 129.83, 125.94, 116.48, 70.30, 69.69, 65.23, 64.83, 43.03, 23.24, 19.38 ppm; HRMS (ESI):  $m/z$  Calcd for  $\text{C}_{13}\text{H}_{16}\text{O}_3$   $[\text{M}+\text{H}^+]$ : 221.1172, found 221.1184.

### 3h

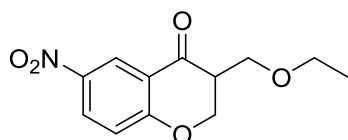

HRMS (ESI):  $m/z$  Calcd for  $\text{C}_{12}\text{H}_{13}\text{NO}_5$   $[\text{M}+\text{H}^+]$ : 252.0872, found 252.0898.

### 3ab

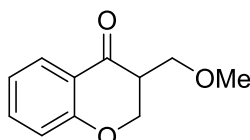

The crude product was separated and purified via silica gel on column chromatography, eluting with petroleum ether/ethyl acetate (5:1) to obtain colorless oily liquid **3ab** (12.98 mg) with a reaction yield of 31%.  $^1\text{H}$  NMR (400 MHz,  $\text{CDCl}_3$ )  $\delta$ : 7.95 (dd,  $J = 4.0$  Hz,  $J = 7.9$  Hz, 1H), 7.51-7.56 (m, 1H), 7.03-7.10 (m, 1H), 4.69 (dd,  $J = 4.9$  Hz,  $J = 11.5$  Hz, 1H), 4.49 (dd,  $J = 10.0$  Hz,  $J = 11.3$  Hz, 1H), 3.85 (dd,  $J = 4.6$  Hz,  $J = 9.8$  Hz, 1H), 3.76 (dd,  $J = 8.1$  Hz,  $J = 9.7$  Hz, 1H), 3.44 (s, 3H), 3.07-3.14 (m, 1H) ppm;  $^{13}\text{C}$  NMR (100 MHz,  $\text{CDCl}_3$ )  $\delta$ : 192.10, 161.85, 135.97, 127.31, 121.40, 117.89, 69.06, 68.27, 59.16, 46.40 ppm; HRMS (ESI):  $m/z$  Calcd for  $\text{C}_{11}\text{H}_{12}\text{O}_3$   $[\text{M}+\text{H}^+]$ : 193.0865, found 193.0864.

### 3ac

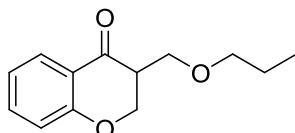

The crude product was separated and purified via silica gel on column chromatography, eluting with petroleum ether/ethyl acetate (5:1) to obtain yellow oily liquid **3ac** (11.89 mg) with a reaction yield of 26%.  $^1\text{H}$  NMR (600 MHz,  $\text{CDCl}_3$ )  $\delta$ : 7.80-7.79 (m, 1H), 7.42-7.39 (m, 1H), 6.94 (t,  $J = 7.2$  Hz, 1H), 6.90 (d,  $J = 8.4$  Hz, 1H), 4.48-4.45 (m, 1H), 4.18 (t,  $J = 7.6$  Hz, 1H), 3.39-3.34 (m, 1H), 2.93 (dd,  $J = 4.8$  Hz, 1H), 2.54-2.49 (m, 1H), 2.47-2.45 (m, 1H), 2.42-2.38 (m, 1H), 1.18 (s, 2H), 1.04 (t,  $J = 6.4$  Hz, 1H) ppm;  $^{13}\text{C}$  NMR (150 MHz,  $\text{CDCl}_3$ )  $\delta$ : 208.42, 193.50, 161.78, 135.99, 127.31, 121.44, 117.84, 70.33, 41.78, 37.66, 36.30, 29.70, 7.78 ppm; HRMS (ESI):  $m/z$  Calcd for  $\text{C}_{13}\text{H}_{16}\text{O}_3$   $[\text{M}+\text{H}^+]$ : 221.1178, found 221.1184.

**3ae**

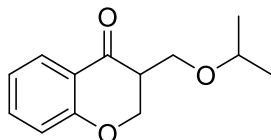

The crude product was separated and purified via silica gel on column chromatography, eluting with petroleum ether/ethyl acetate (5:1) to obtain colorless oily liquid **3ae** (31.70 mg) with a reaction yield of 48%.  $^1\text{H}$  NMR (400 MHz,  $\text{CDCl}_3$ )  $\delta$ : 7.96 (d,  $J = 7.9$  Hz, 1H), 7.55 (dd,  $J = 1.2$  Hz,  $J = 8.4$  Hz, 1H), 7.08 (t,  $J = 7.6$  Hz, 1H), 7.03 (d,  $J = 8.4$  Hz, 1H), 4.63 (dd,  $J = 5.4$  Hz,  $J = 11.3$  Hz, 1H), 4.28 (t,  $J = 11.7$  Hz, 1H), 3.09-3.16 (m, 1H), 2.17-2.25 (m, 1H), 1.44 (dd,  $J = 4.5$  Hz, 1H), 1.43 (s,  $J = 4.8$  Hz, 3H), 1.37 (s,  $J = 4.8$  Hz, 3H) ppm;  $^{13}\text{C}$  NMR (100 MHz,  $\text{CDCl}_3$ )  $\delta$ : 195.17, 160.75, 135.12, 126.54, 120.37, 119.51, 116.69, 70.51, 68.53, 41.43, 37.74, 28.39 ppm; HRMS (ESI):  $m/z$  Calcd for  $\text{C}_{13}\text{H}_{16}\text{O}_3$  [ $\text{M}+\text{H}^+$ ]: 221.1178, found 221.1191.

**3af**

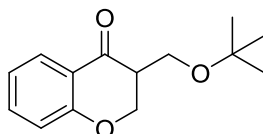

HRMS (ESI):  $m/z$  Calcd for  $\text{C}_{14}\text{H}_{18}\text{NO}_3$  [ $\text{M}+\text{H}^+$ ]: 235.1334, found 235.1362.

**3ag**

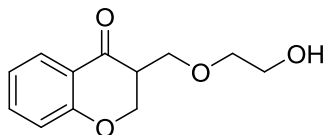

HRMS (ESI):  $m/z$  Calcd for  $\text{C}_{12}\text{H}_{14}\text{O}$  [ $\text{M}+\text{H}^+$ ]: 235.0970, found 235.0996.

**3ah**

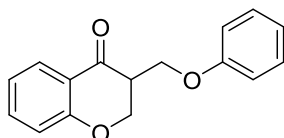

HRMS (ESI):  $m/z$  Calcd for  $\text{C}_{16}\text{H}_{14}\text{O}_3$  [ $\text{M}+\text{H}^+$ ]: 233.1178, found 233.1301.

**5a**

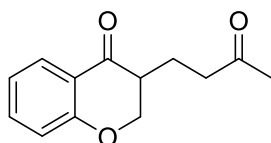

The crude product was separated and purified via silica gel on column chromatography, eluting with petroleum ether/ethyl acetate (5:1) to obtain colorless oily liquid **5a** (54.30 mg) with a reaction yield of 83%.  $^1\text{H}$  NMR (400 MHz,  $\text{CDCl}_3$ )  $\delta$ : 7.87 (d,  $J = 7.8$  Hz, 1H), 7.47 (t,  $J = 7.7$  Hz, 1H), 7.02 (t,  $J = 7.5$  Hz, 1H), 6.96 (d,  $J = 8.3$  Hz, 1H), 4.52 (dd,  $J = 4.3$  Hz,  $J = 11.4$  Hz, 1H), 4.27 (dd,  $J = 8.5$  Hz,  $J = 11.4$  Hz, 1H), 2.63-2.76 (m, 3H), 2.17 (s, 3H), 1.99-2.09 (m, 1H), 1.80-1.89 (m, 1H) ppm;  $^{13}\text{C}$  NMR (100 MHz,  $\text{CDCl}_3$ )  $\delta$ : 207.86, 194.36, 161.39, 135.92, 127.30, 121.42, 120.40, 117.73, 70.86, 44.85, 40.72, 30.01, 20.71 ppm; HRMS (ESI):  $m/z$  Calcd for  $\text{C}_{13}\text{H}_{14}\text{O}_3$  [ $\text{M}+\text{H}^+$ ]: 219.1021, found 219.1019.

**5b**

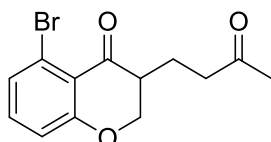

The crude product was separated and purified via silica gel on column chromatography, eluting with petroleum ether/ethyl acetate (5:1) to obtain colorless oily liquid **5b** (71.04 mg) with a reaction yield of 78%. <sup>1</sup>H NMR (400 MHz, CDCl<sub>3</sub>) δ: 7.21-7.29 (m, 1H), 6.94 (d, *J* = 10.5 Hz, 2H), 4.51 (dd, *J* = 4.5 Hz, *J* = 11.4 Hz, 1H), 4.26 (dd, *J* = 8.4 Hz, *J* = 11.4 Hz, 1H), 2.65-2.77 (m, 3H), 2.17 (s, 3H), 1.97-2.07 (m, 1H), 1.77-1.85 (m, 1H) ppm; <sup>13</sup>C NMR (100 MHz, CDCl<sub>3</sub>) δ: 207.77, 192.61, 162.78, 134.91, 128.34, 121.64, 118.56, 117.55, 70.35, 45.18, 40.70, 29.97, 20.59 ppm; HRMS (ESI): *m/z* Calcd for C<sub>13</sub>H<sub>13</sub>BrO<sub>3</sub> [M+H<sup>+</sup>]: 297.0126, found 297.0136.

#### 5c

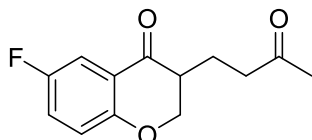

The crude product was separated and purified via silica gel on column chromatography, eluting with petroleum ether/ethyl acetate (5:1) to obtain colorless oily liquid **5c** (61.62 mg) with a reaction yield of 87%. <sup>1</sup>H NMR (400 MHz, CDCl<sub>3</sub>) δ: 7.51 (dd, *J* = 3.2 Hz, *J* = 8.3 Hz, 1H), 7.17-7.22 (m, 1H), 6.94 (dd, *J* = 4.2 Hz, *J* = 9.0 Hz, 1H), 4.50 (dd, *J* = 4.4 Hz, *J* = 11.5 Hz, 1H), 4.25 (dd, *J* = 8.5 Hz, *J* = 11.5 Hz, 1H), 2.64-2.72 (m, 3H), 2.17 (s, 3H), 1.99-2.08 (m, 1H), 1.80-1.88 (m, 1H) ppm; <sup>13</sup>C NMR (100 MHz, CDCl<sub>3</sub>) δ: 207.62, 193.55, 157.67, 157.65, 156.06, 123.55, 123.30, 120.87, 120.81, 119.42, 119.37, 119.35, 112.31, 112.07, 71.05, 44.69, 40.60, 29.95, 20.62 ppm; <sup>19</sup>F NMR (564 MHz, CDCl<sub>3</sub>) δ: -121.42 (s, 1F) ppm. HRMS(ESI): *m/z* Calcd for C<sub>13</sub>H<sub>13</sub>FO<sub>3</sub> [M+H<sup>+</sup>]: 237.0927, found 237.0938.

#### 5d

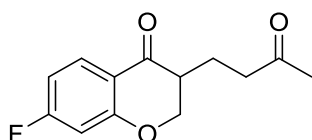

The crude product was separated and purified via silica gel on column chromatography, eluting with petroleum ether/ethyl acetate (5:1) to obtain colorless oily liquid **5d** (56.66 mg) with a reaction yield of 80%. <sup>1</sup>H NMR (400 MHz, CDCl<sub>3</sub>) δ: 7.88 (dd, *J* = 6.8 Hz, *J* = 8.7 Hz, 1H), 6.74 (dt, *J* = 2.2 Hz, *J* = 8.6 Hz, 1H), 6.64 (dd, *J* = 2.2 Hz, *J* = 9.8 Hz, 1H), 4.53 (dd, *J* = 4.4 Hz, *J* = 11.5 Hz, 1H), 4.28 (dd, *J* = 8.4 Hz, *J* = 11.4 Hz, 1H), 2.64-2.71 (m, 3H), 2.17 (s, 3H), 1.99-2.08 (m, 1H), 1.79-1.91 (m, 1H) ppm; <sup>13</sup>C NMR (100 MHz, CDCl<sub>3</sub>) δ: 207.66, 192.89, 168.64, 166.10, 163.04 (d, *J* = 13.6 Hz), 129.83 (d, *J* = 11.3 Hz), 117.36, 109.85 (d, *J* = 22.6 Hz), 104.45 (d, *J* = 24.4 Hz), 71.34, 44.56, 40.65, 29.95, 20.63 ppm. <sup>19</sup>F NMR (564 MHz, CDCl<sub>3</sub>) δ: -100.60 (d, *J* = 2.82 Hz, 1F) ppm. HRMS(ESI): *m/z* Calcd for C<sub>13</sub>H<sub>13</sub>FO<sub>3</sub> [M+H<sup>+</sup>]: 237.0927, found 237.0937.

#### 5e

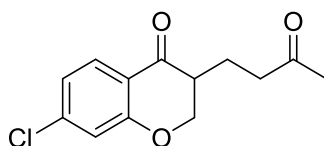

The crude product was separated and purified via silica gel on column chromatography, eluting with petroleum ether/ethyl acetate (5:1) to obtain colorless oily liquid **5e** (62.01 mg) with a reaction yield of 82%. <sup>1</sup>H NMR (400 MHz, CDCl<sub>3</sub>) δ: 7.78 (dd, *J* = 7.8 Hz, *J* = 8.8 Hz, 1H), 6.97-7.00 (m, 2H), 4.52 (dd, *J* = 4.4 Hz, *J* = 11.5 Hz, 1H), 4.27 (dd, *J* = 8.5 Hz, *J* = 11.5 Hz, 1H), 2.63-2.72 (m, 3H), 2.16 (s, 3H), 1.98-2.07 (m, 1H), 1.77-1.86 (m, 1H) ppm; <sup>13</sup>C NMR (100 MHz, CDCl<sub>3</sub>) δ: 207.63, 193.26, 161.73, 141.73, 128.55, 122.23, 119.00, 117.86, 71.20, 44.69, 40.61, 30.00, 20.61 ppm; HRMS (ESI): *m/z* Calcd for C<sub>13</sub>H<sub>13</sub>ClO<sub>3</sub> [M+H<sup>+</sup>]: 253.0631, found 253.0696.

**5f**

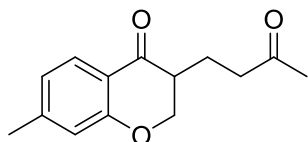

The crude product was separated and purified via silica gel on column chromatography, eluting with petroleum ether/ethyl acetate (5:1) to obtain colorless oily liquid **5f** (48.74 mg) with a reaction yield of 70%. <sup>1</sup>H NMR (400 MHz, CDCl<sub>3</sub>) δ: 7.75 (d, *J* = 8.0 Hz, 1 H), 6.83 (d, *J* = 8.0 Hz, 1H), 6.76 (s, 1H), 4.48 (dd, *J* = 4.4 Hz, *J* = 11.5 Hz, 1H), 4.25 (dd, *J* = 8.5 Hz, *J* = 11.5 Hz, 1H), 2.60-2.67 (m, 3H), 2.35 (s, 3H), 2.16 (s, 3H), 1.98-2.07 (m, 1H), 1.77-1.88 (m, 1H) ppm; <sup>13</sup>C NMR (100 MHz, CDCl<sub>3</sub>) δ: 207.83, 194.01, 161.43, 147.41, 127.18, 122.81, 118.18, 117.68, 70.88, 44.81, 40.76, 29.95, 21.87, 20.84 ppm; HRMS (ESI): *m/z* Calcd for C<sub>14</sub>H<sub>16</sub>O<sub>3</sub> [M+H<sup>+</sup>]: 233.1178, found 233.1183.

**5ab**

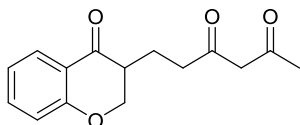

The crude product was separated and purified via silica gel on column chromatography, eluting with petroleum ether/ethyl acetate (5:1) to obtain colorless oily liquid **5ab** (68.06 mg) with a reaction yield of 48%. <sup>1</sup>H NMR (600 MHz, CDCl<sub>3</sub>) δ: 7.84 (d, *J* = 7.8 Hz, 1H), 7.40 (d, *J* = 7.9 Hz, 1H), 7.88 (d, *J* = 7.8 Hz, 2H), 4.41-4.38 (m, 1H), 4.24-4.21 (m, 1H), 2.77 (dd, *J* = 4.8 Hz, 1H), 2.43-2.33 (m, 2H), 2.12 (s, 3H), 2.10 (d, *J* = 2.4 Hz, 1H), 2.02-1.99 (m, 2H), 1.99-1.97 (m, 1H) ppm; <sup>13</sup>C NMR (150 MHz, CDCl<sub>3</sub>) δ: 193.56, 192.07, 161.41, 127.49, 127.29, 120.25, 120.21, 106.60, 68.89, 47.14, 43.57, 29.70, 27.21, 14.14 ppm; HRMS (ESI): *m/z* Calcd for C<sub>15</sub>H<sub>16</sub>O<sub>4</sub> [M+H<sup>+</sup>]: 261.1127, found 261.1137.

**5ab'**

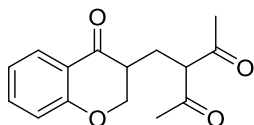

The crude product was separated and purified via silica gel on column chromatography, eluting with petroleum ether/ethyl acetate (5:1) to obtain colorless oily liquid **5ab'** (68.06 mg) with a reaction yield of 48%. <sup>1</sup>H NMR (600 MHz, CDCl<sub>3</sub>) δ: 7.78 (d, *J* = 7.8 Hz, 1H), 7.45-7.41 (m, 1H), 6.99-6.91 (m, 2H), 4.44 (dd, *J* = 4.8 Hz, 1H), 4.24-4.15 (m, 2H), 3.97 (dd, *J* = 4.8 Hz, 1H), 2.57-2.53 (m, 2H), 2.20 (s, 3H), 2.16 (s, 3H) ppm; <sup>13</sup>C NMR (150 MHz, CDCl<sub>3</sub>) δ: 193.56, 192.07, 161.41, 127.49, 127.29, 120.25, 120.21, 106.60, 68.89, 47.14, 43.57, 29.70, 27.21, 14.14 ppm; HRMS (ESI): *m/z* Calcd for C<sub>15</sub>H<sub>16</sub>O<sub>4</sub> [M+H<sup>+</sup>]: 261.1127, found 261.1137.

**5ac**

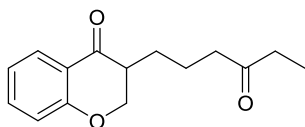

The crude product was separated and purified via silica gel on column chromatography, eluting with petroleum ether/ethyl acetate (5:1) to obtain colorless oily liquid **5ac** (59.28 mg) with a reaction yield of 32%. <sup>1</sup>H NMR (600 MHz, CDCl<sub>3</sub>) δ: 7.80 (d, *J* = 7.2 Hz, 1H), 7.40 (t, *J* = 7.2 Hz, 1H), 6.95 (d, *J* = 7.2 Hz, 1H), 6.88 (d, *J* = 7.2 Hz, 1H), 4.42-4.39 (m, 1H), 4.20-4.17 (m, 1H), 4.07-4.04 (m, 1H), 2.79-2.74 (m, 1H), 2.55-2.40 (m, 3H), 1.81-1.77 (m, 1H), 1.74-1.69 (m, 1H), 1.20 (s, 2H), 1.04-1.03 (m, 3H) ppm; <sup>13</sup>C NMR (150 MHz, CDCl<sub>3</sub>) δ: 193.38, 160.88, 135.33, 126.12, 124.36, 120.49, 119.78, 116.93, 67.59, 58.35, 46.64, 30.91, 28.68, 21.68, 13.11 ppm; HRMS (ESI): *m/z* Calcd for C<sub>15</sub>H<sub>18</sub>O<sub>3</sub> [M+H<sup>+</sup>]: 270.1232, found 270.1284.



**6**

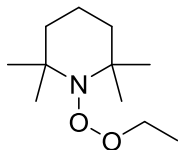

HRMS(ESI):  $m/z$  Calcd for  $C_{11}H_{23}NO_2$   $[M+H]^+$ : 202.1807, found 202.1810.

**7**

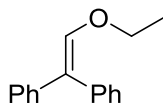

The crude product was separated and purified via silica gel on column chromatography, eluting with petroleum ether/ethyl acetate (5:1) to obtain colorless oily liquid **7** (25.02 mg) with a reaction yield of 20%.  $^1H$  NMR (600 MHz,  $CDCl_3$ )  $\delta$ : 7.80 (t,  $J = 7.2$  Hz, 4H), 7.60-7.58 (m, 2H), 7.49 (t,  $J = 7.2$  Hz, 1H), 7.26 (s, 1H), 4.13 (q,  $J = 7.2$  Hz, 2H), 1.26 (t,  $J = 3.6$  Hz, 3H) ppm;  $^{13}C$  NMR (150 MHz,  $CDCl_3$ )  $\delta$ : 196.82, 171.21, 137.60, 132.44, 130.09, 128.29, 60.63, 21.08 ppm; HRMS (ESI):  $m/z$  Calcd for  $C_{16}H_{16}O$   $[M+H]^+$ : 225.1279, found 225.1285.

**8**

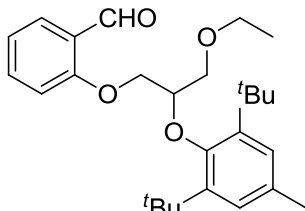

HRMS (ESI):  $m/z$  Calcd for  $C_{27}H_{38}O_4$   $[M+H]^+$ : 427.2848, found 427.2841.

**9**

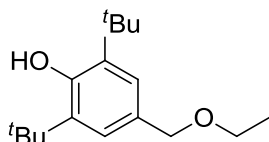

HRMS (ESI):  $m/z$  Calcd for  $C_{17}H_{28}O_2$   $[M+H]^+$ : 265.2168, found 265.2128.

## VI. References

- [1] Zhou, Y.; Xiong, Z.; Qiu, J.; Kong, L.; Zhu, G. *Org. Chem. Front.* **2019**, 6, 1022-1026.

# VII. NMR Charts 3a-<sup>1</sup>H

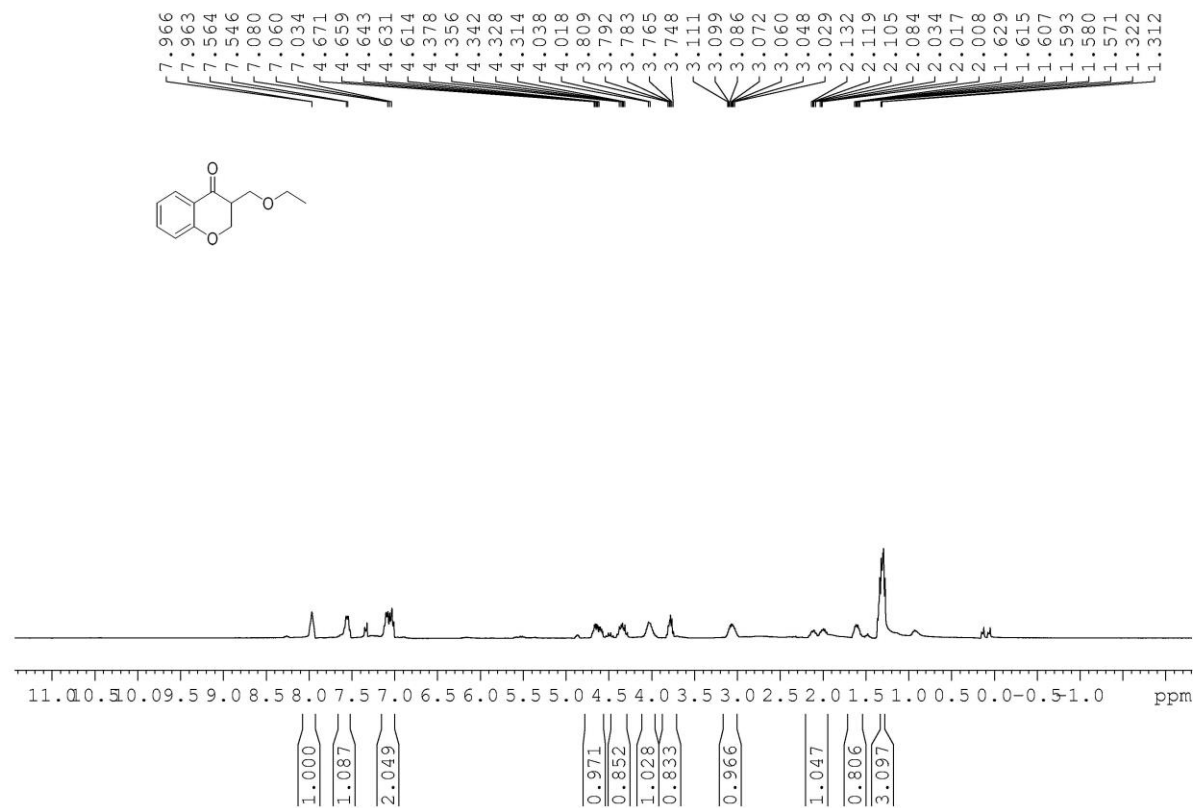

3a-<sup>13</sup>C

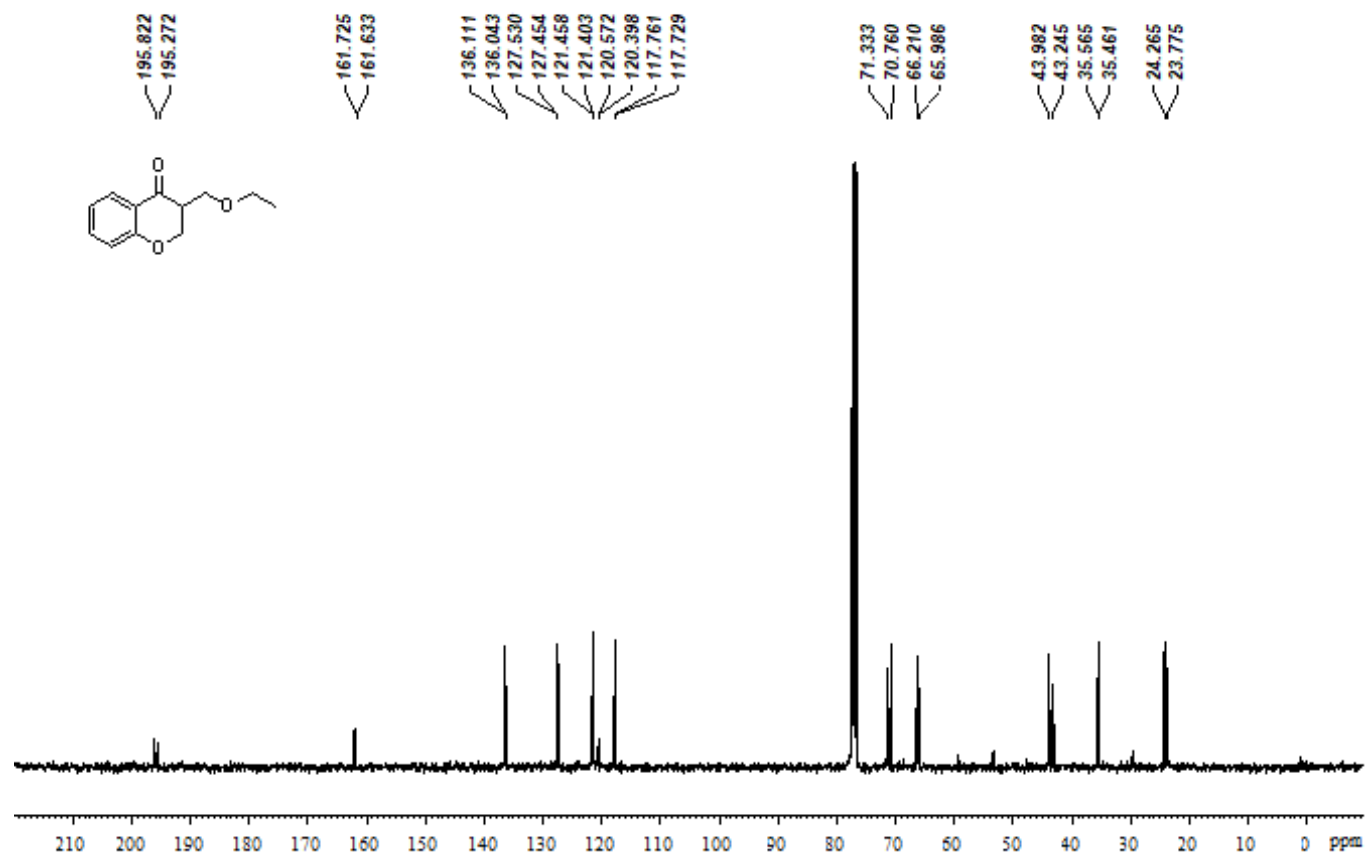

3b-<sup>1</sup>H

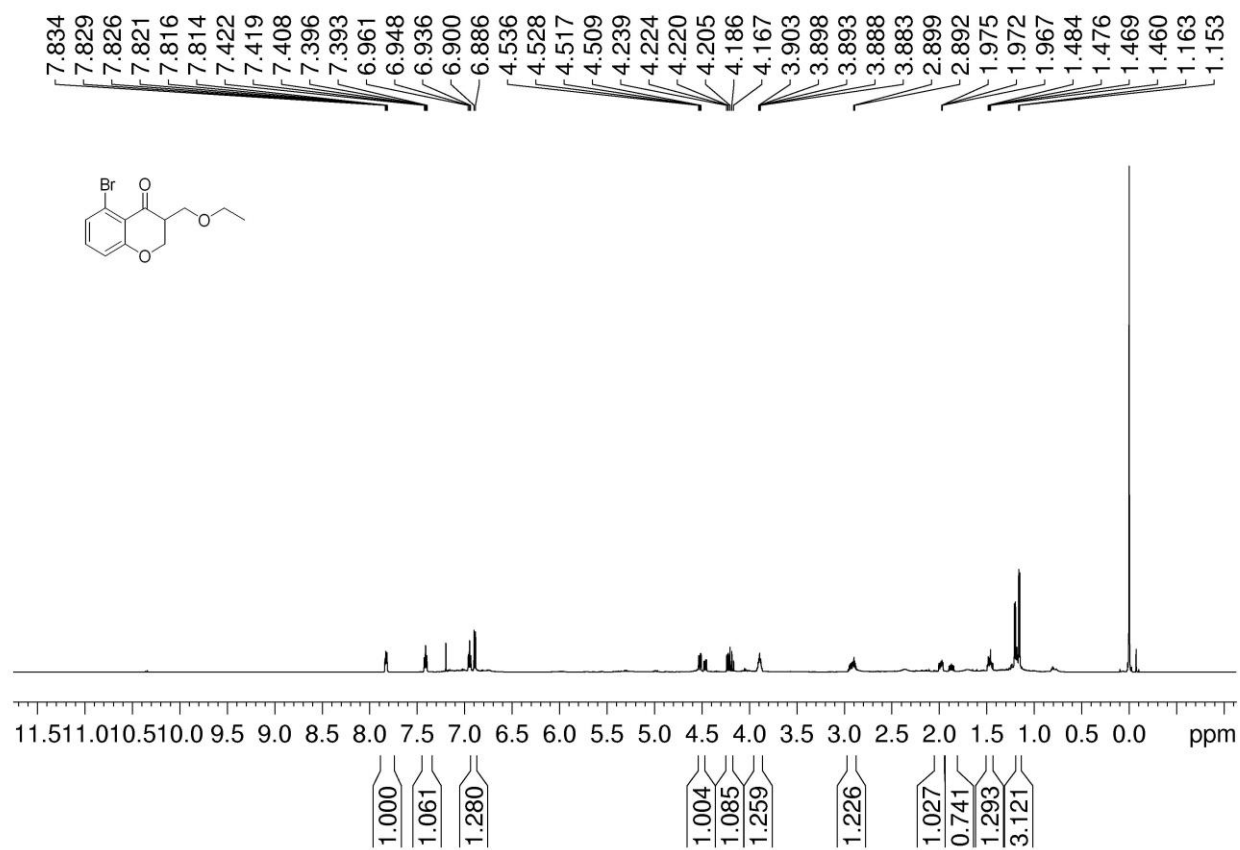

3b-<sup>13</sup>C

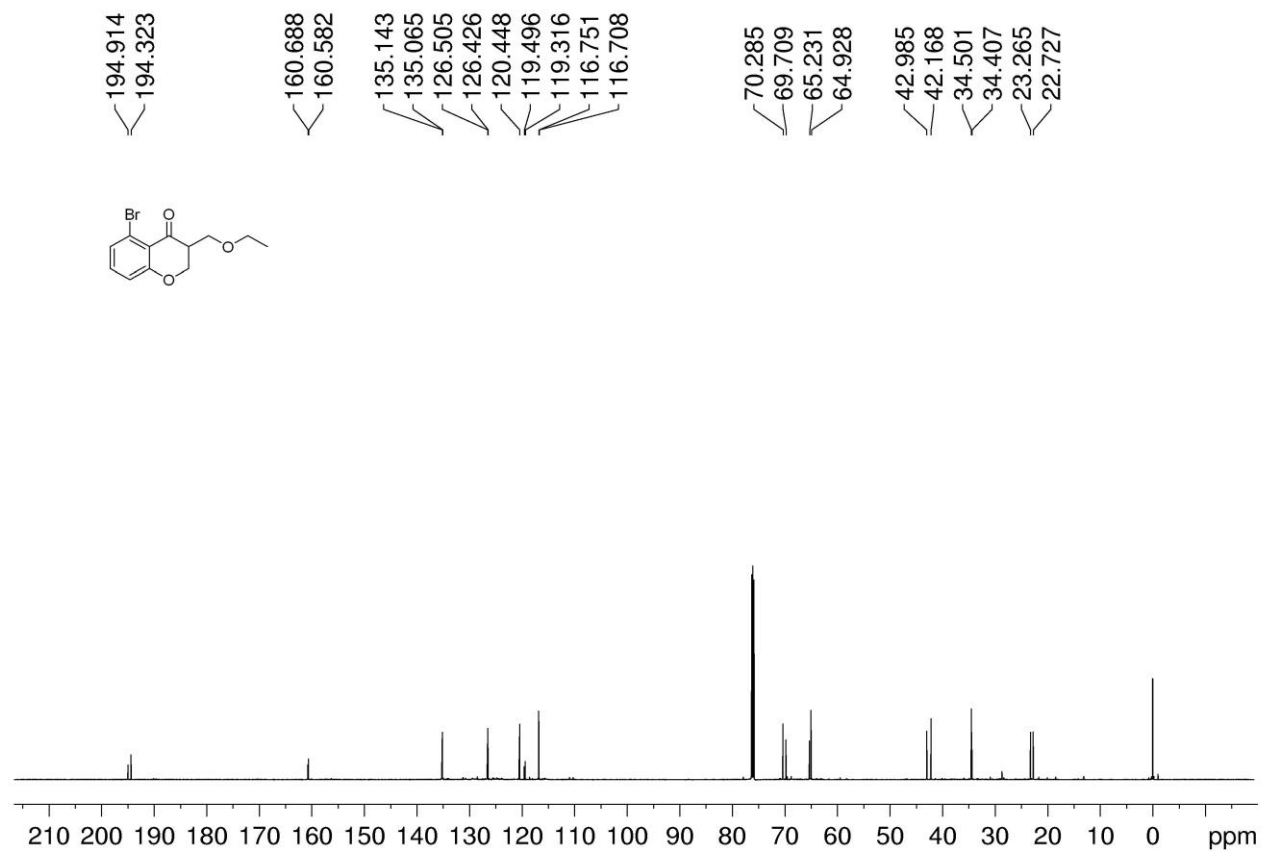

3c-<sup>1</sup>H

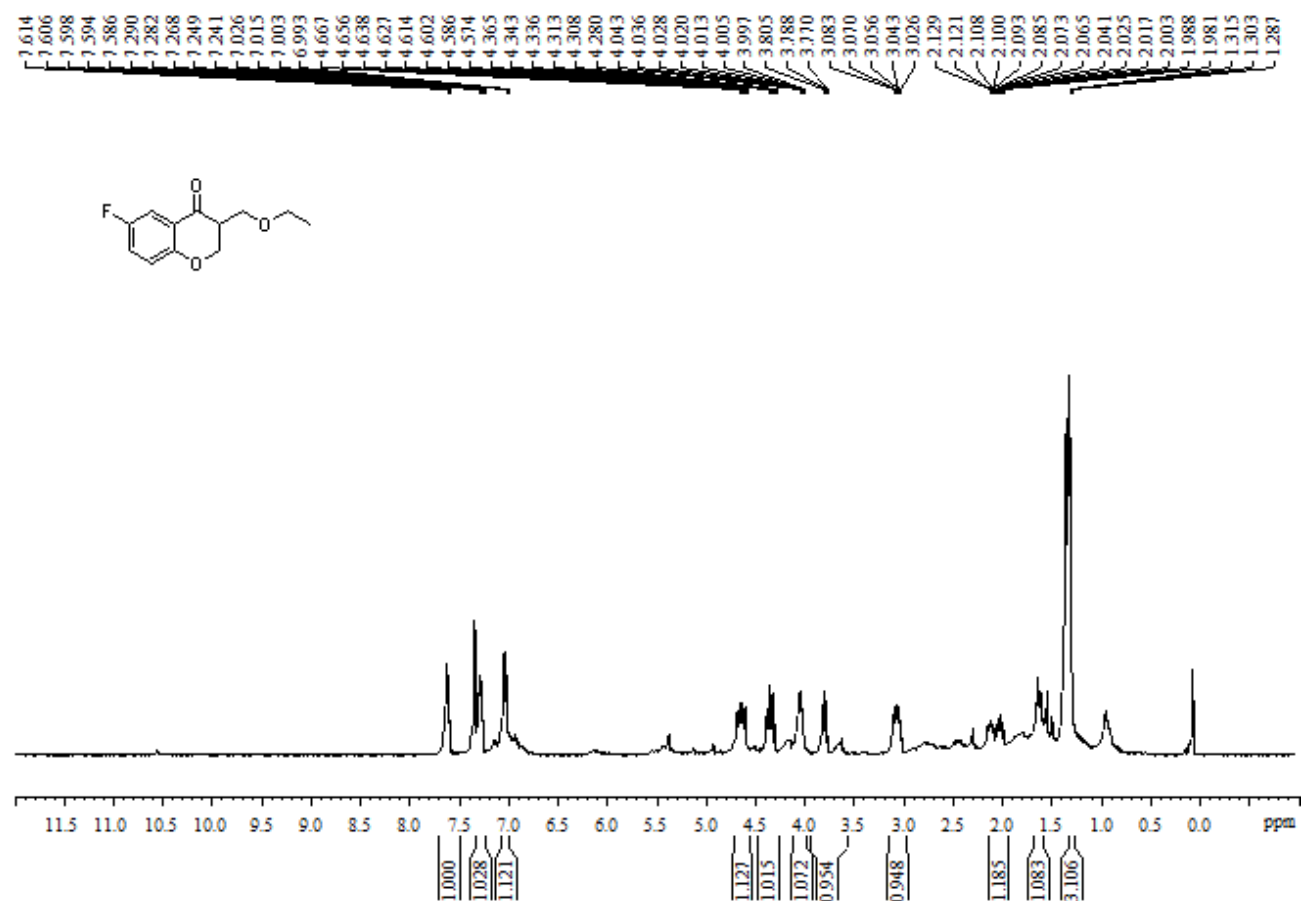

3c-<sup>13</sup>C

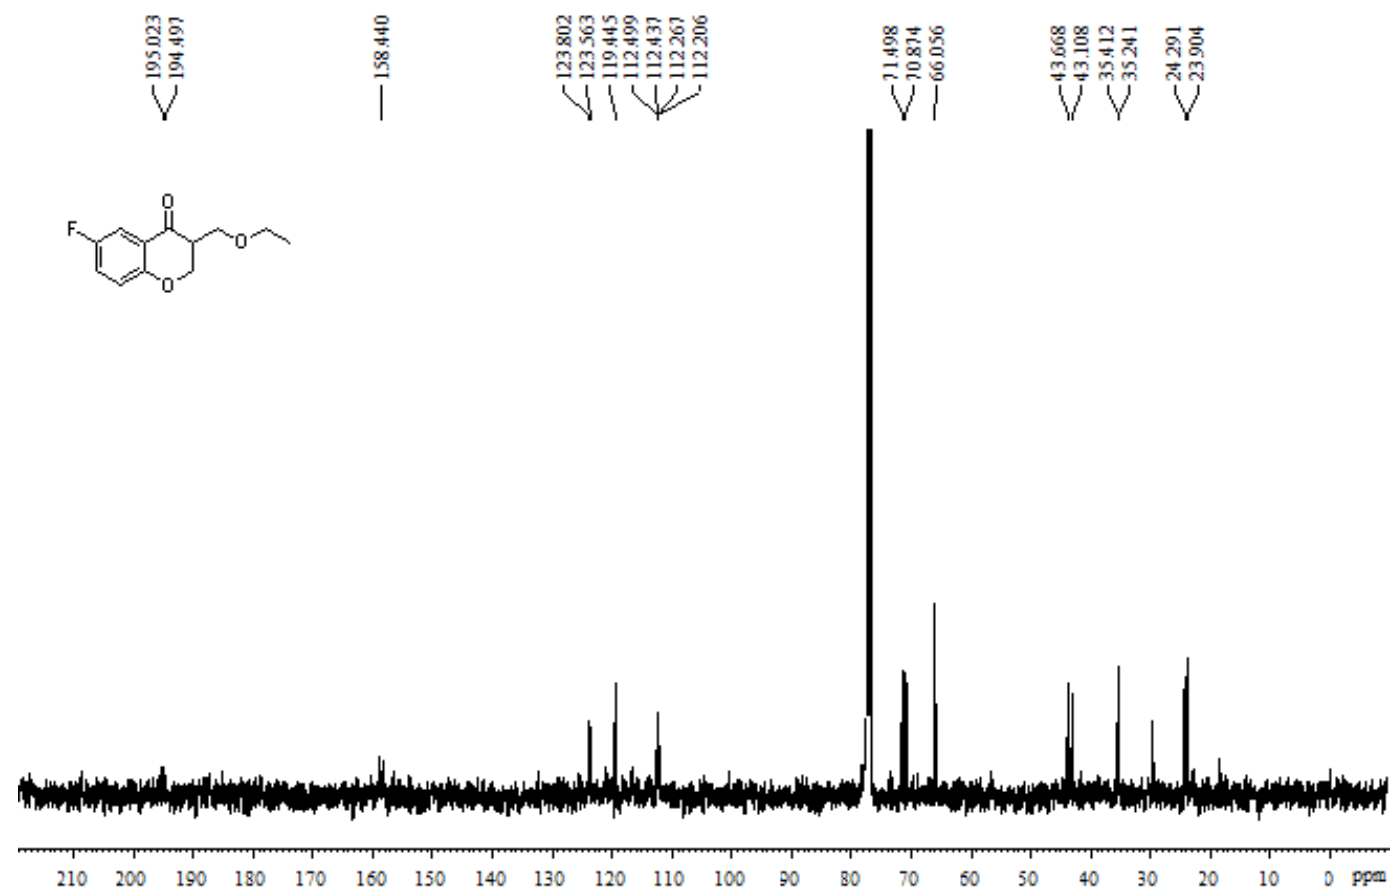

**3c-<sup>19</sup>F**

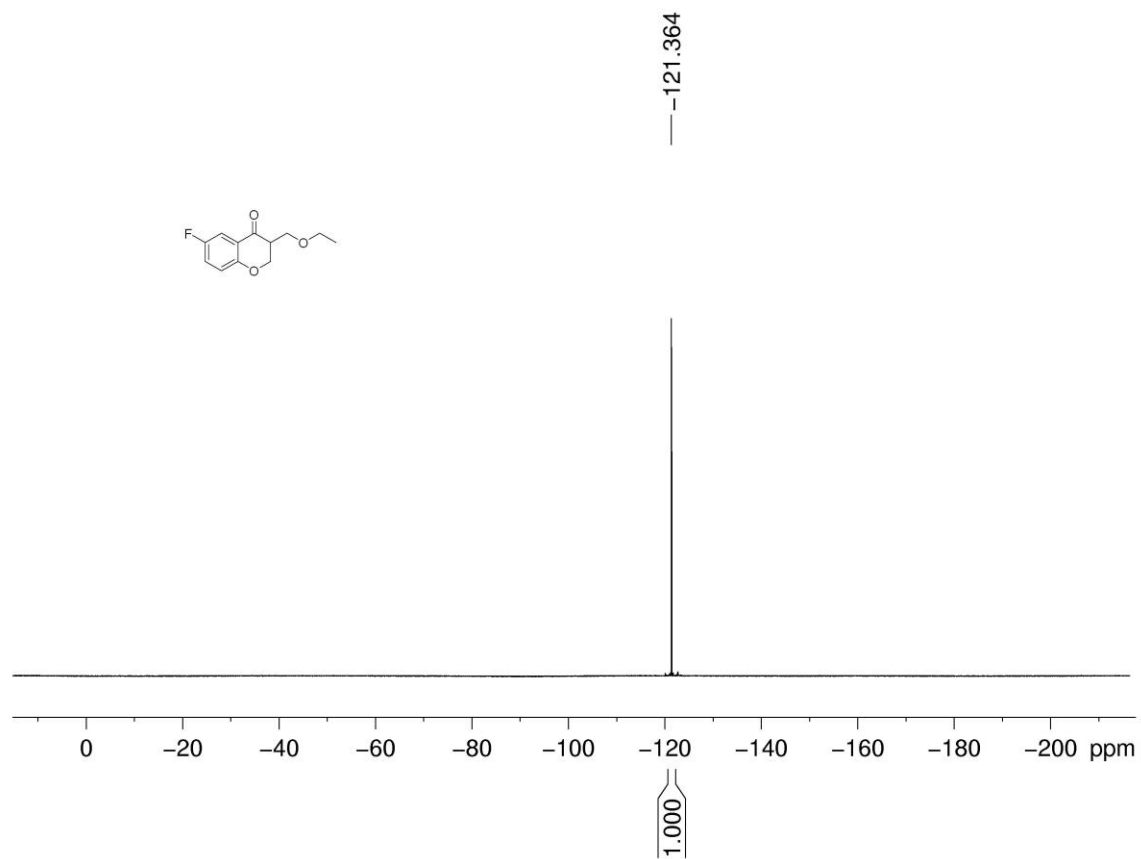



**3d-<sup>1</sup>H**

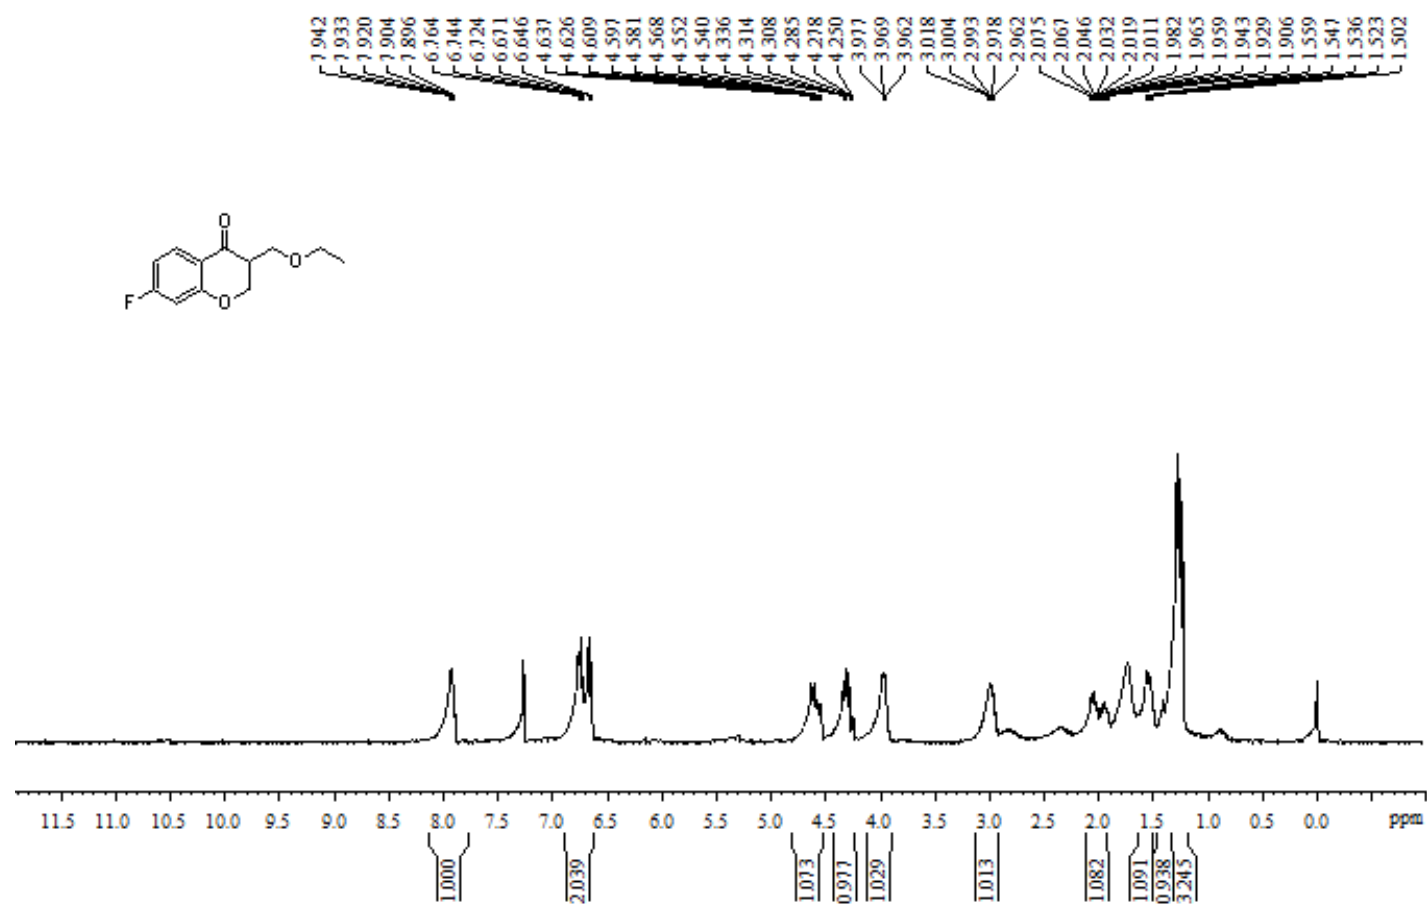

3d-<sup>13</sup>C

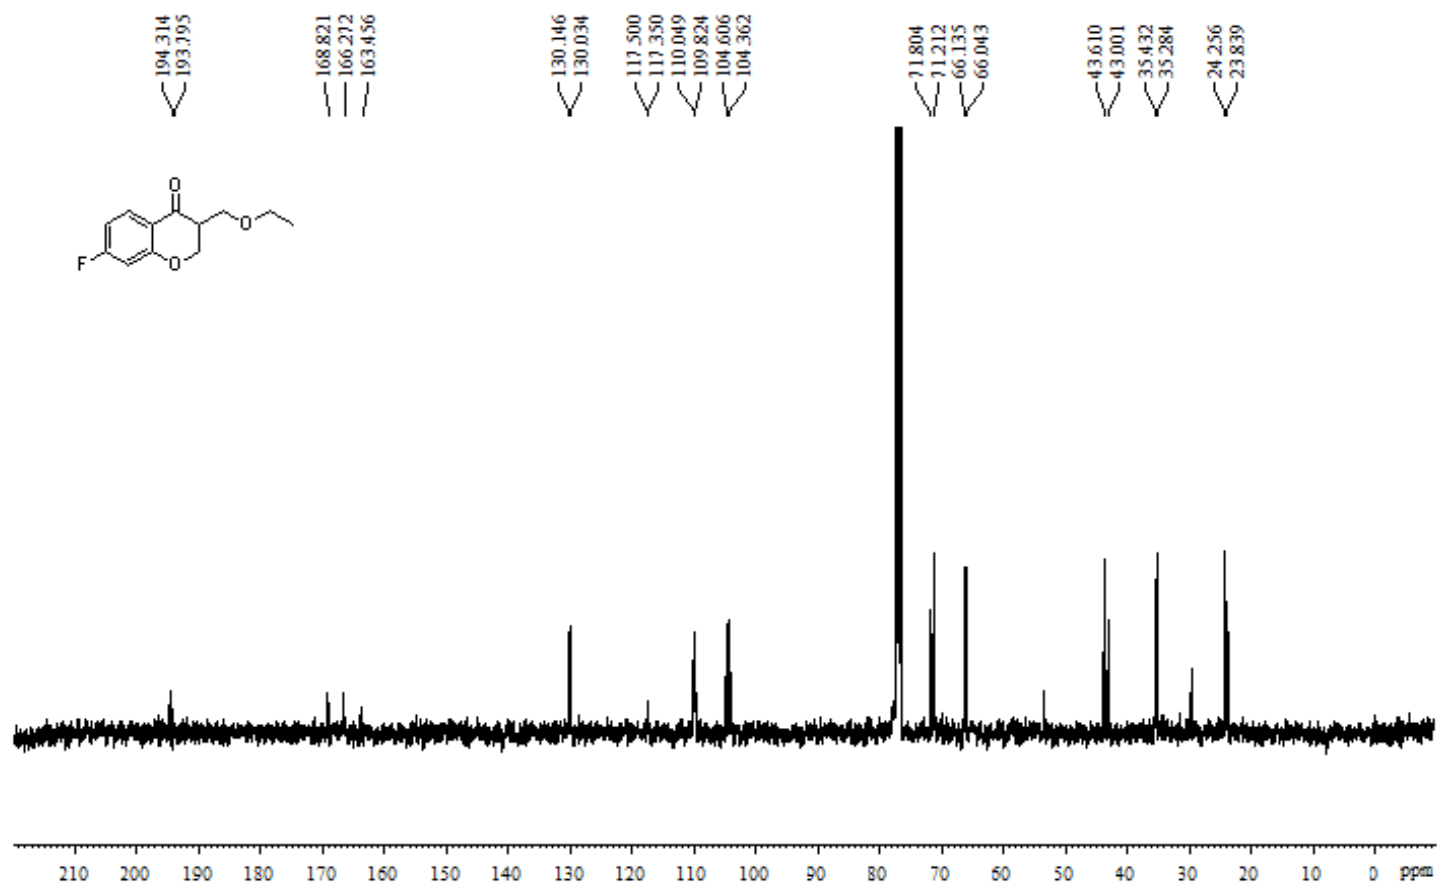

**3d-<sup>19</sup>F**

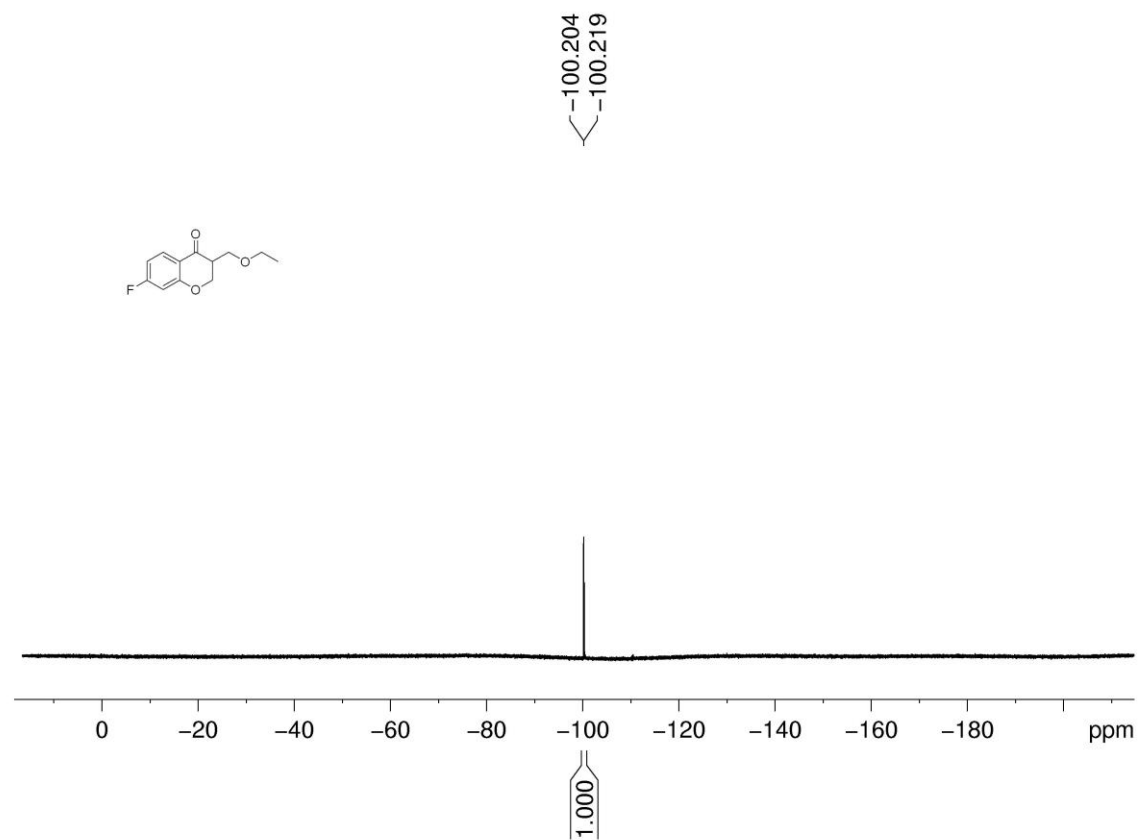

3e-<sup>1</sup>H

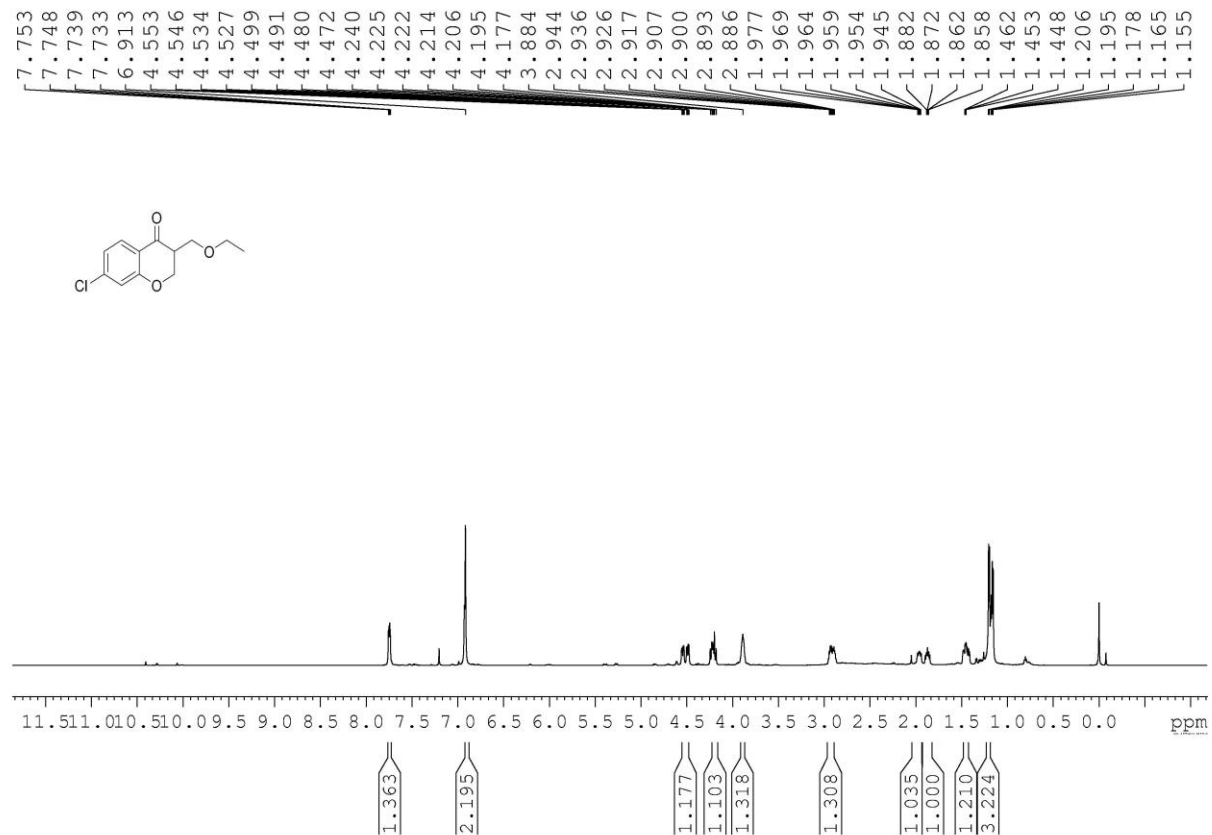

3e-<sup>13</sup>C

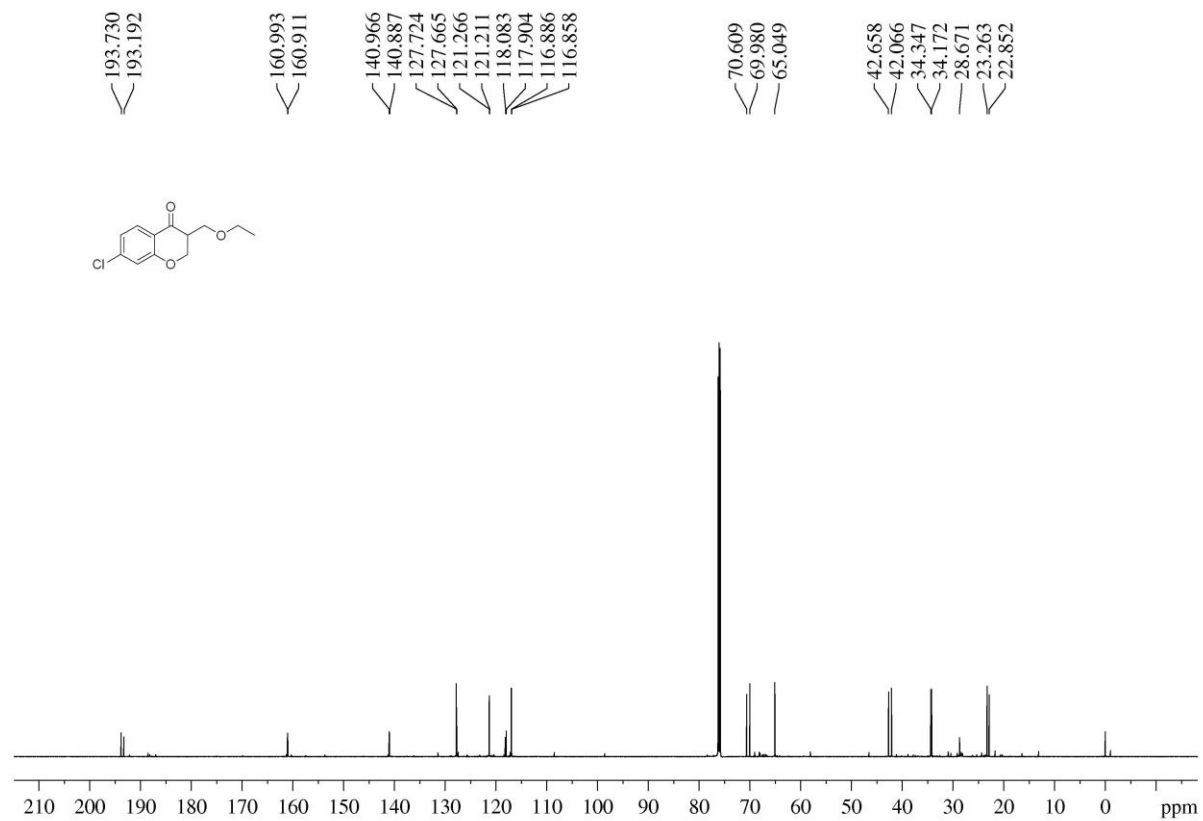

3f-<sup>1</sup>H

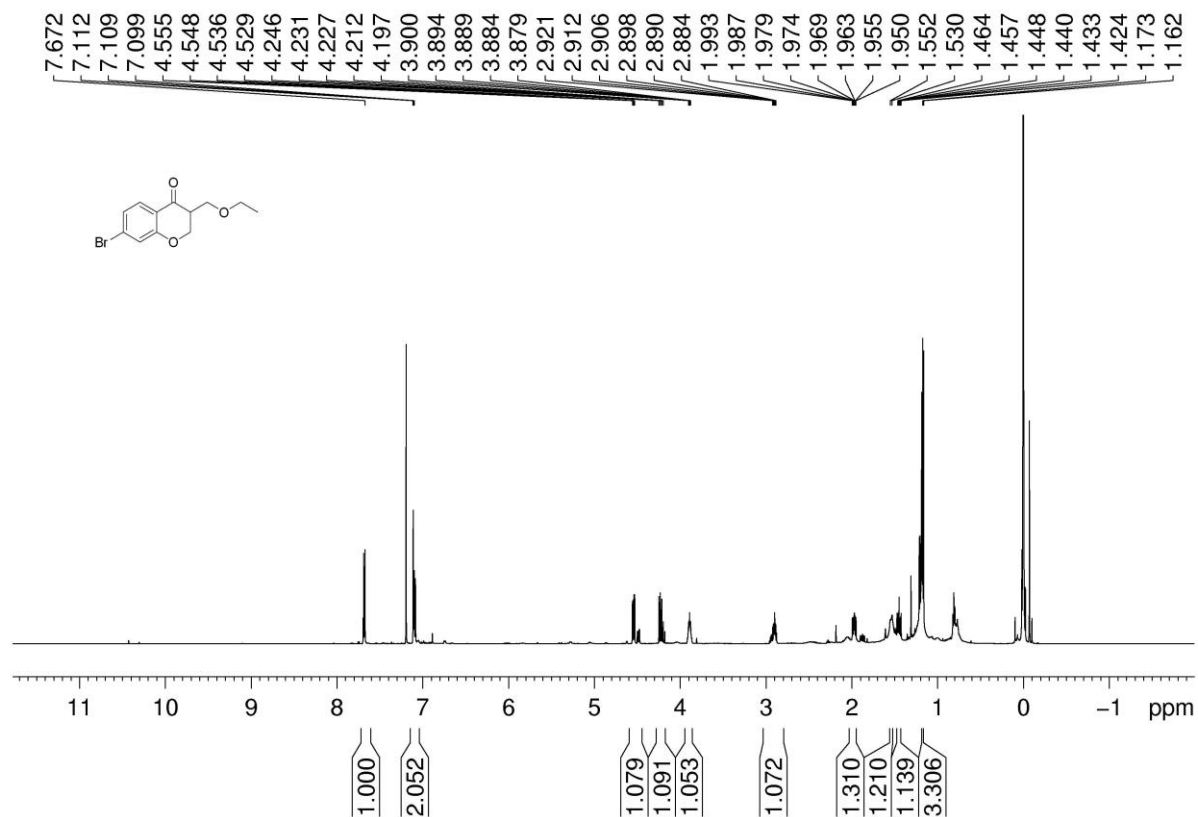

**3f-<sup>13</sup>C**

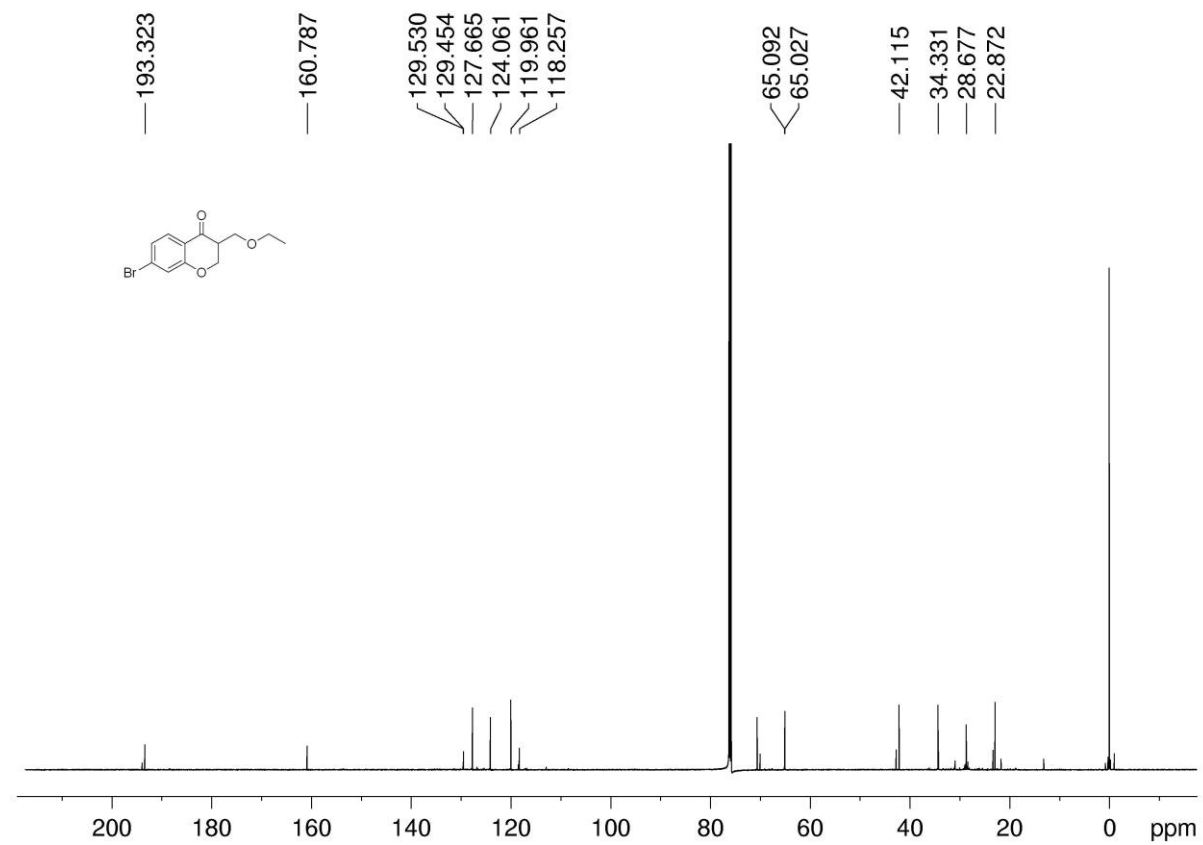

3g-<sup>1</sup>H

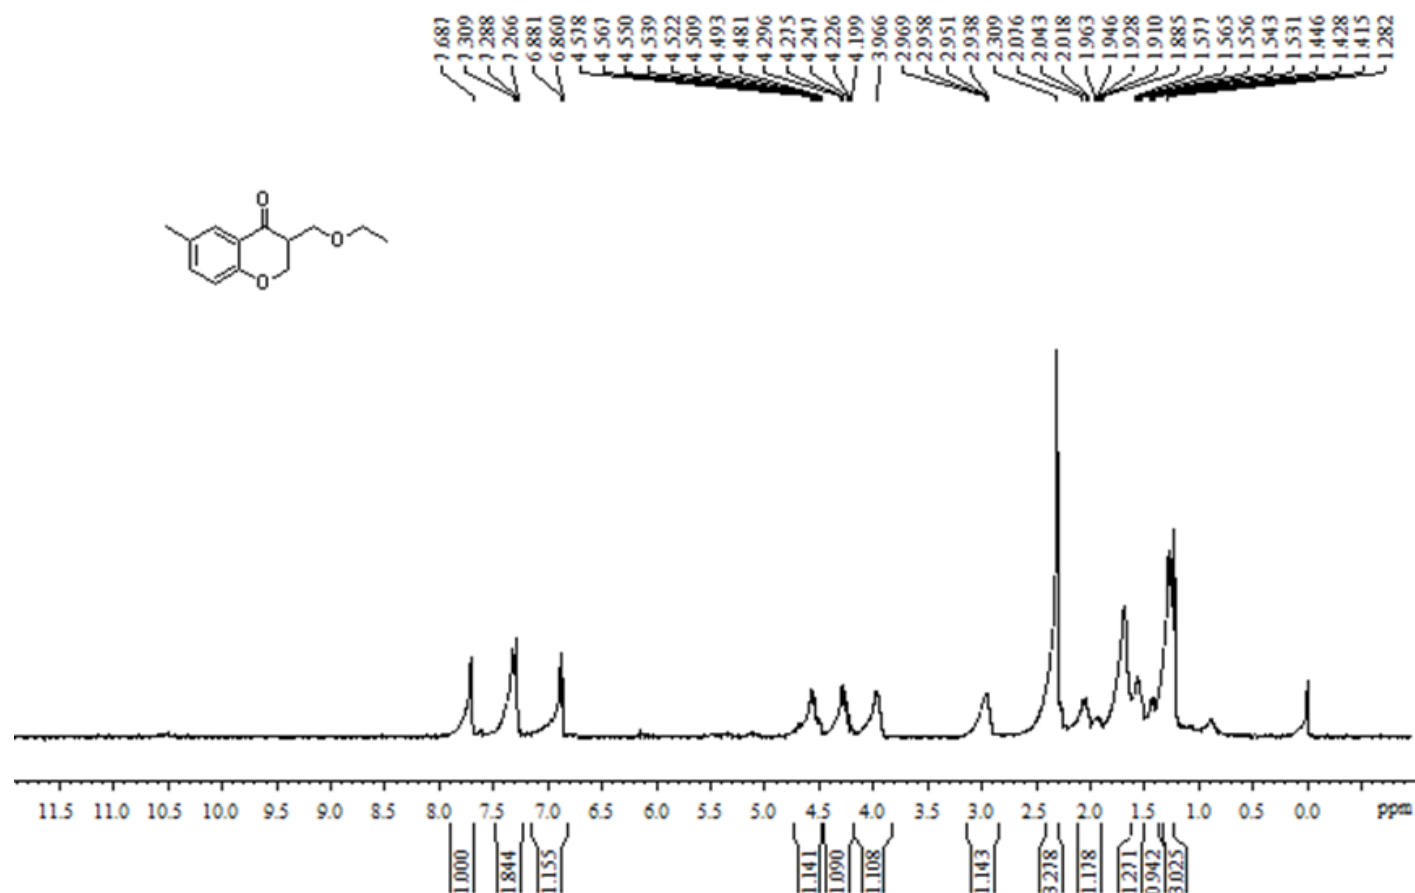



3g-<sup>13</sup>C

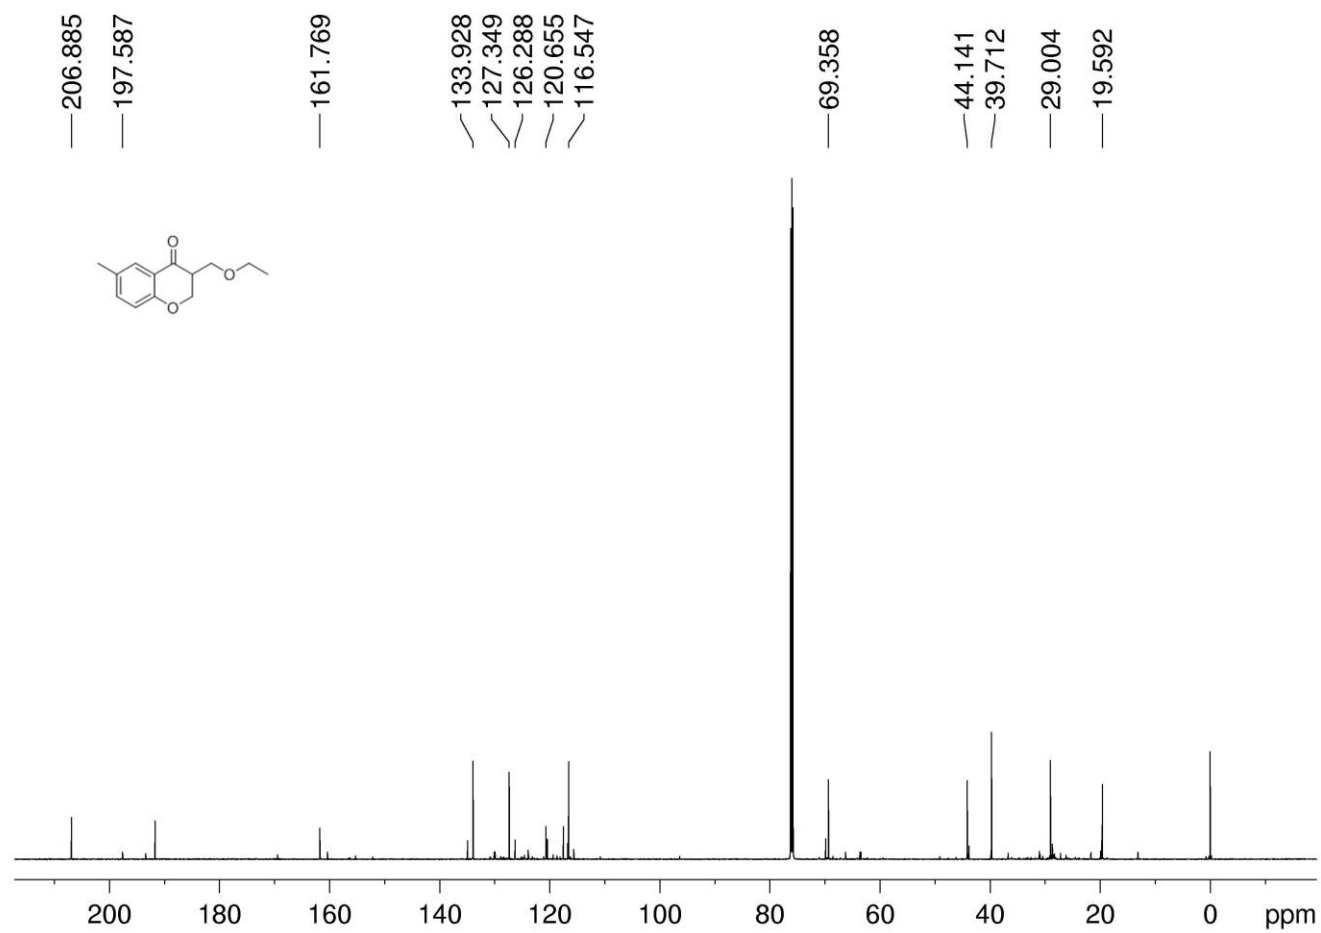

3ab-<sup>1</sup>H

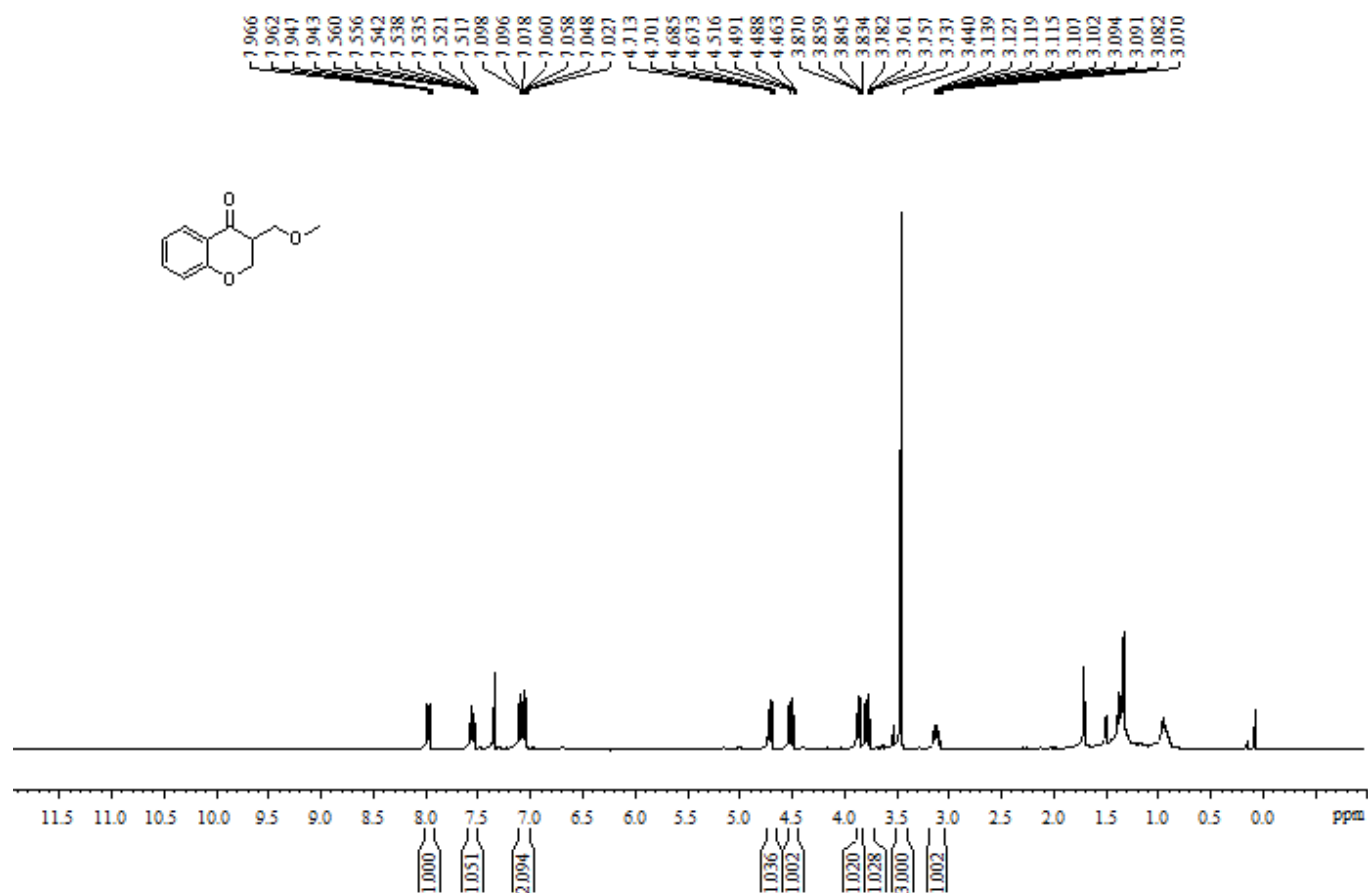

3ab-<sup>13</sup>C

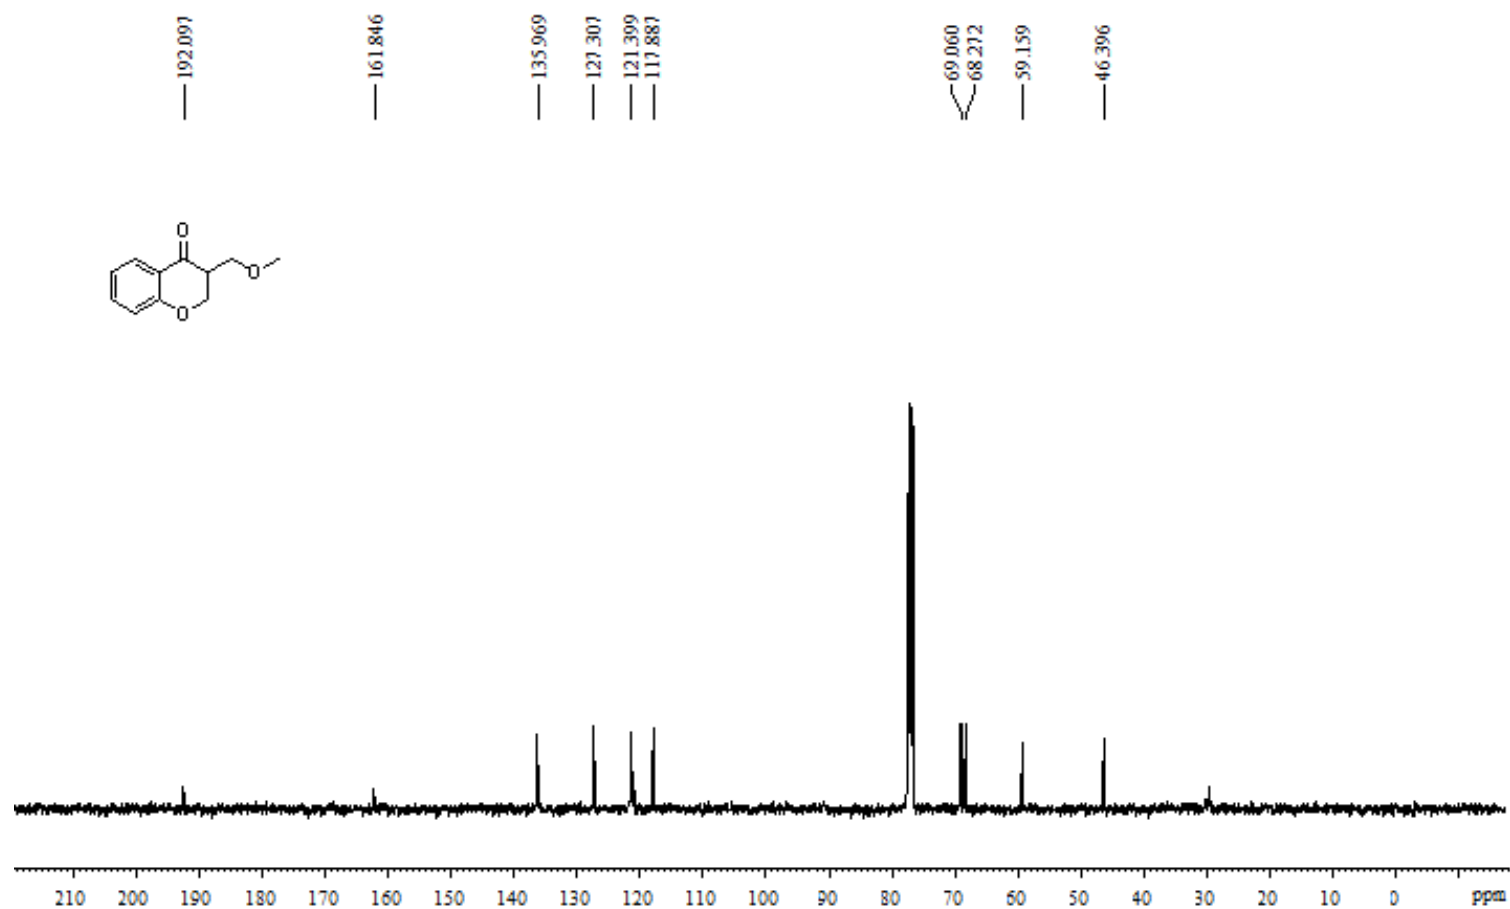

3ac-<sup>1</sup>H

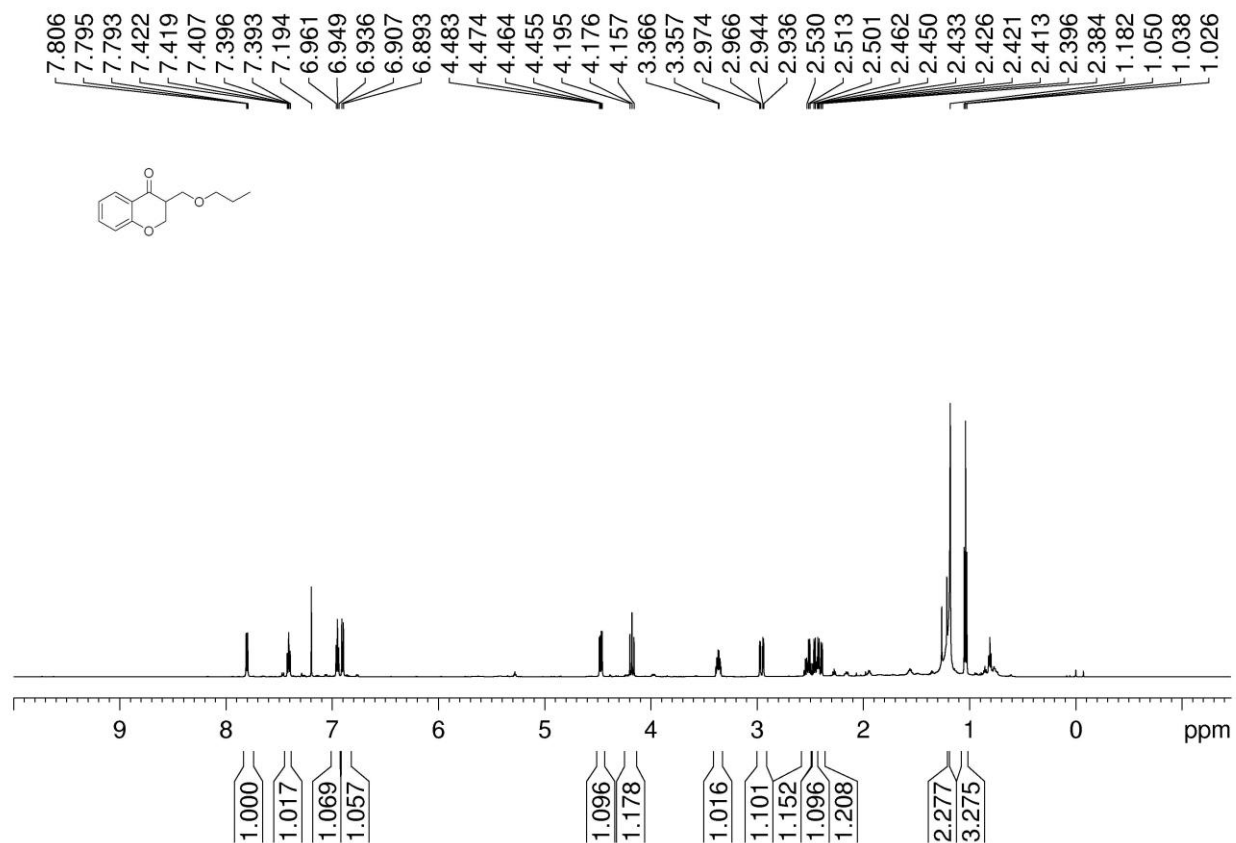

3ac-<sup>13</sup>C

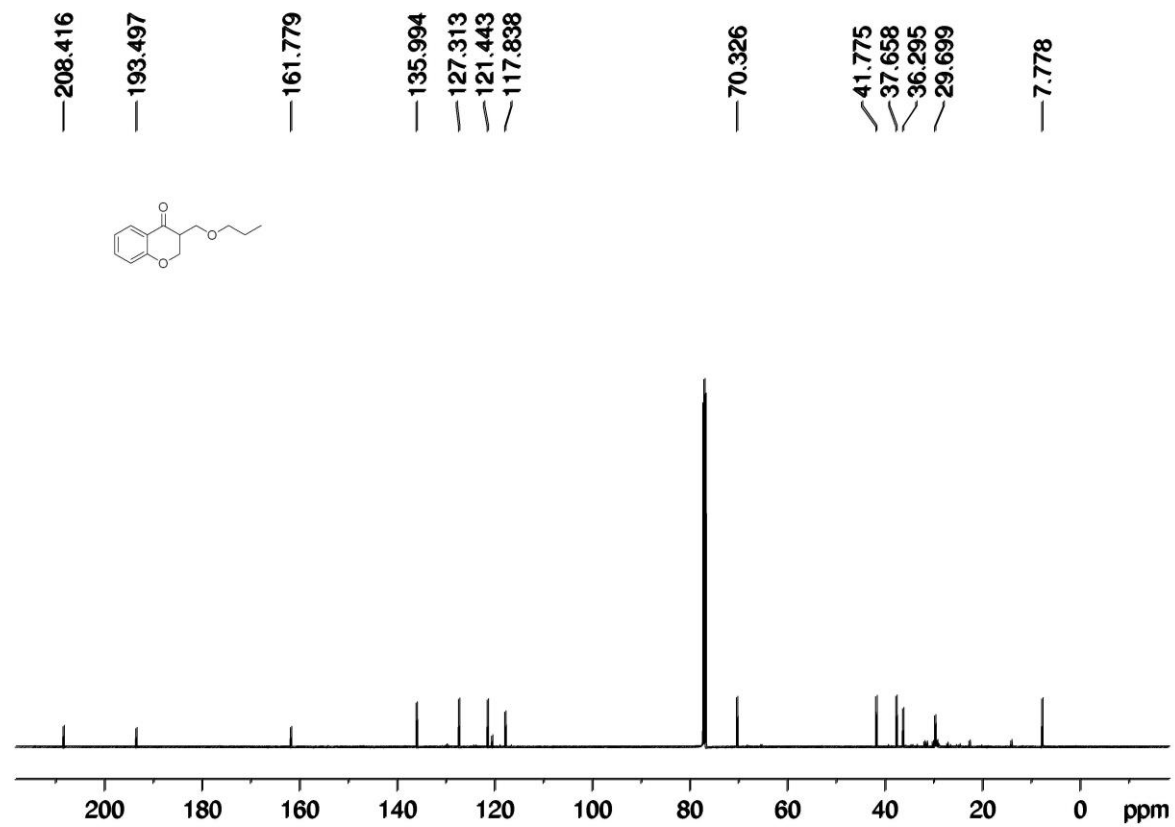

3ae-<sup>1</sup>H

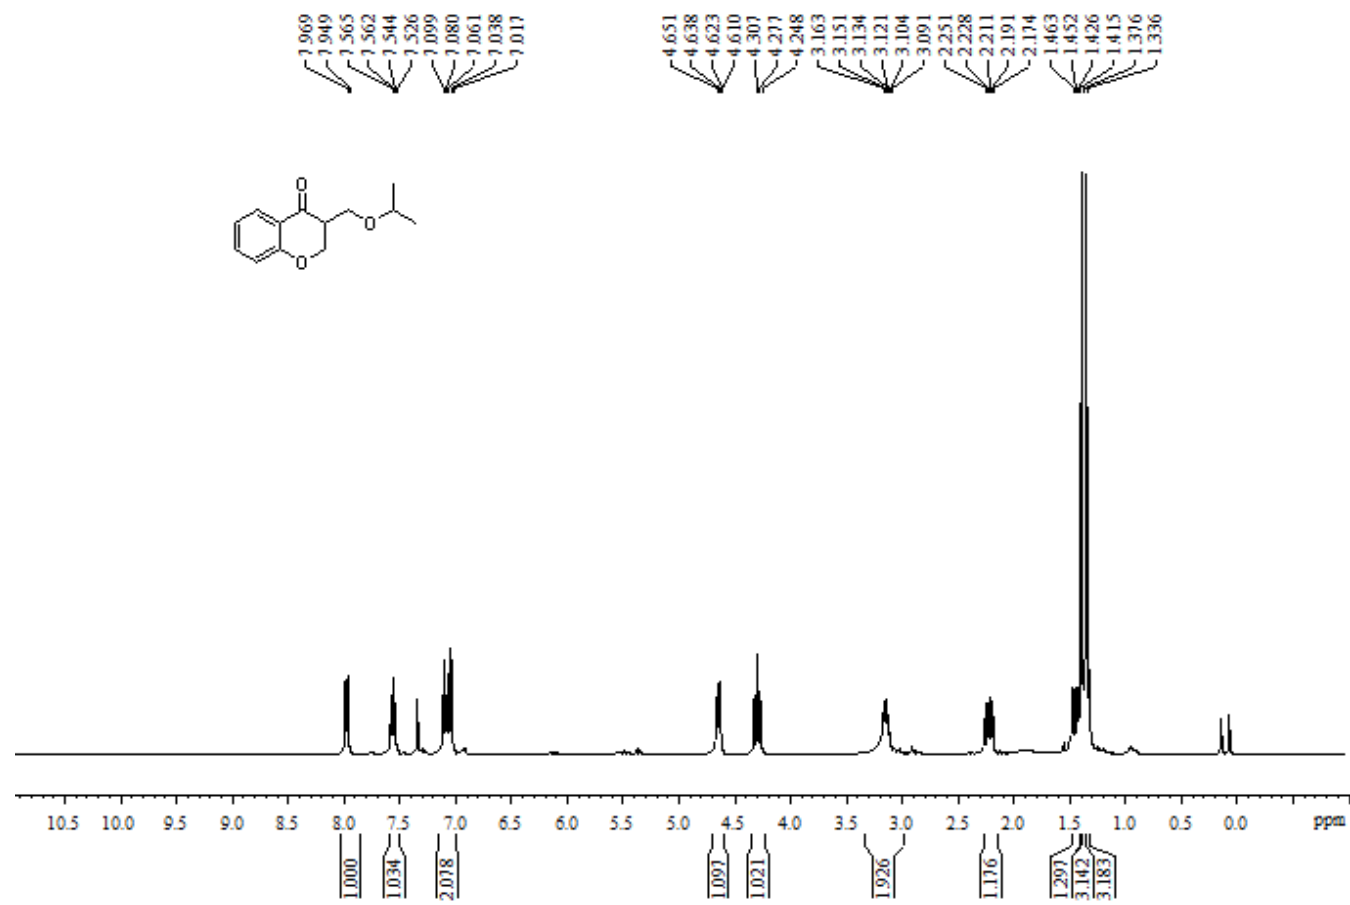

3ae-<sup>13</sup>C

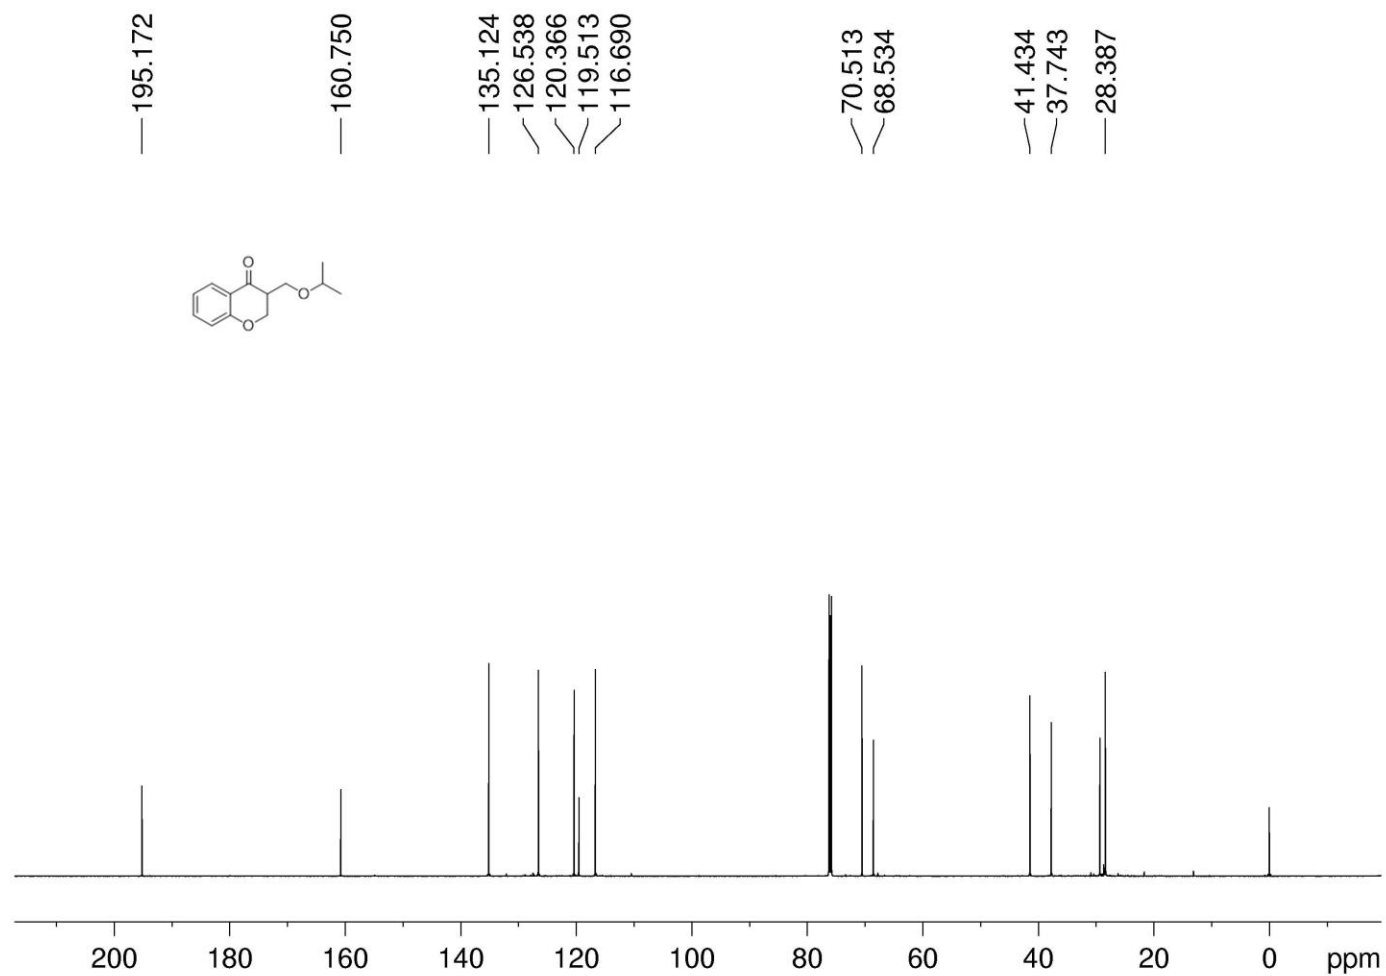

5a-<sup>1</sup>H

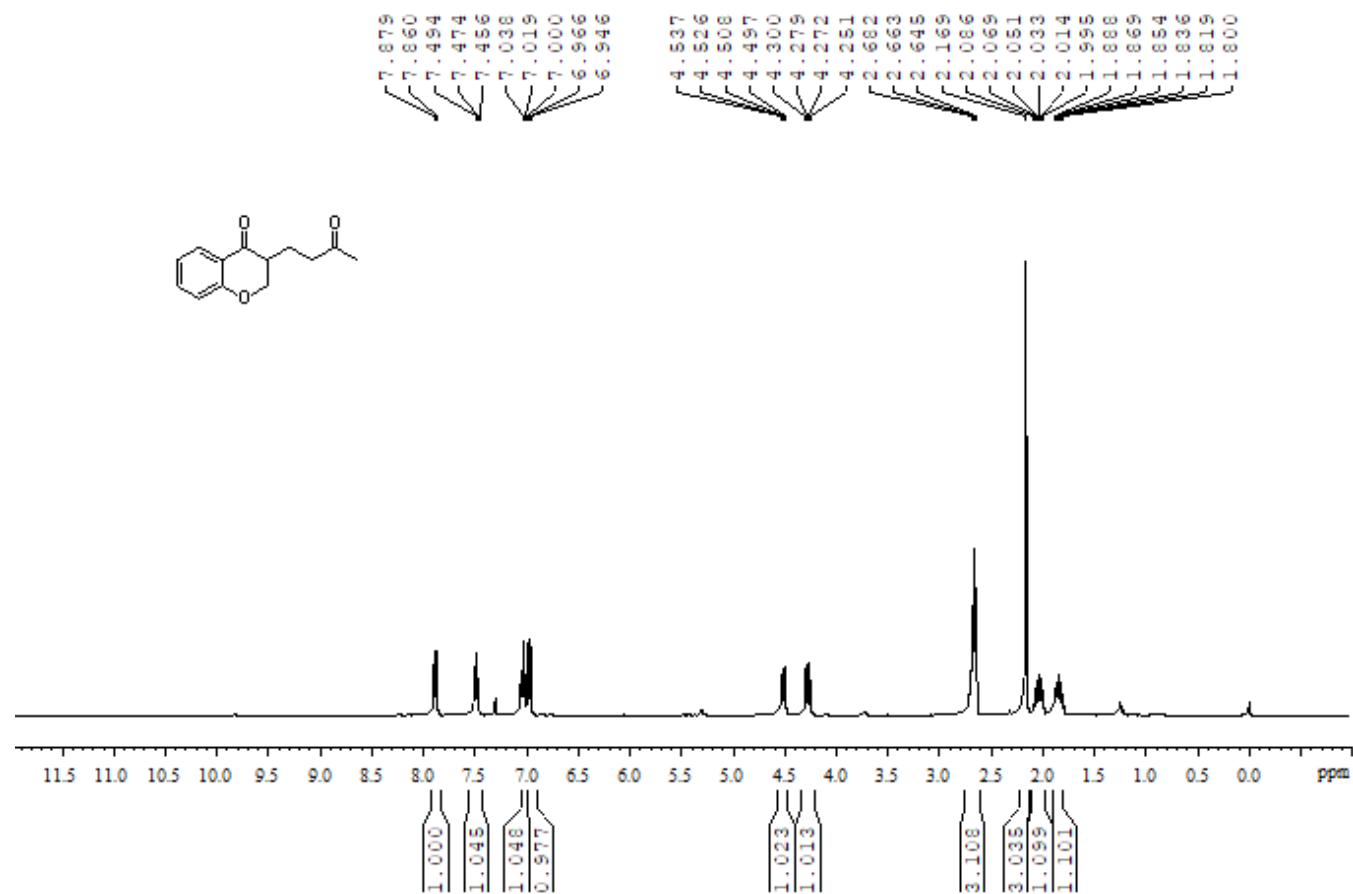



5a-<sup>13</sup>C

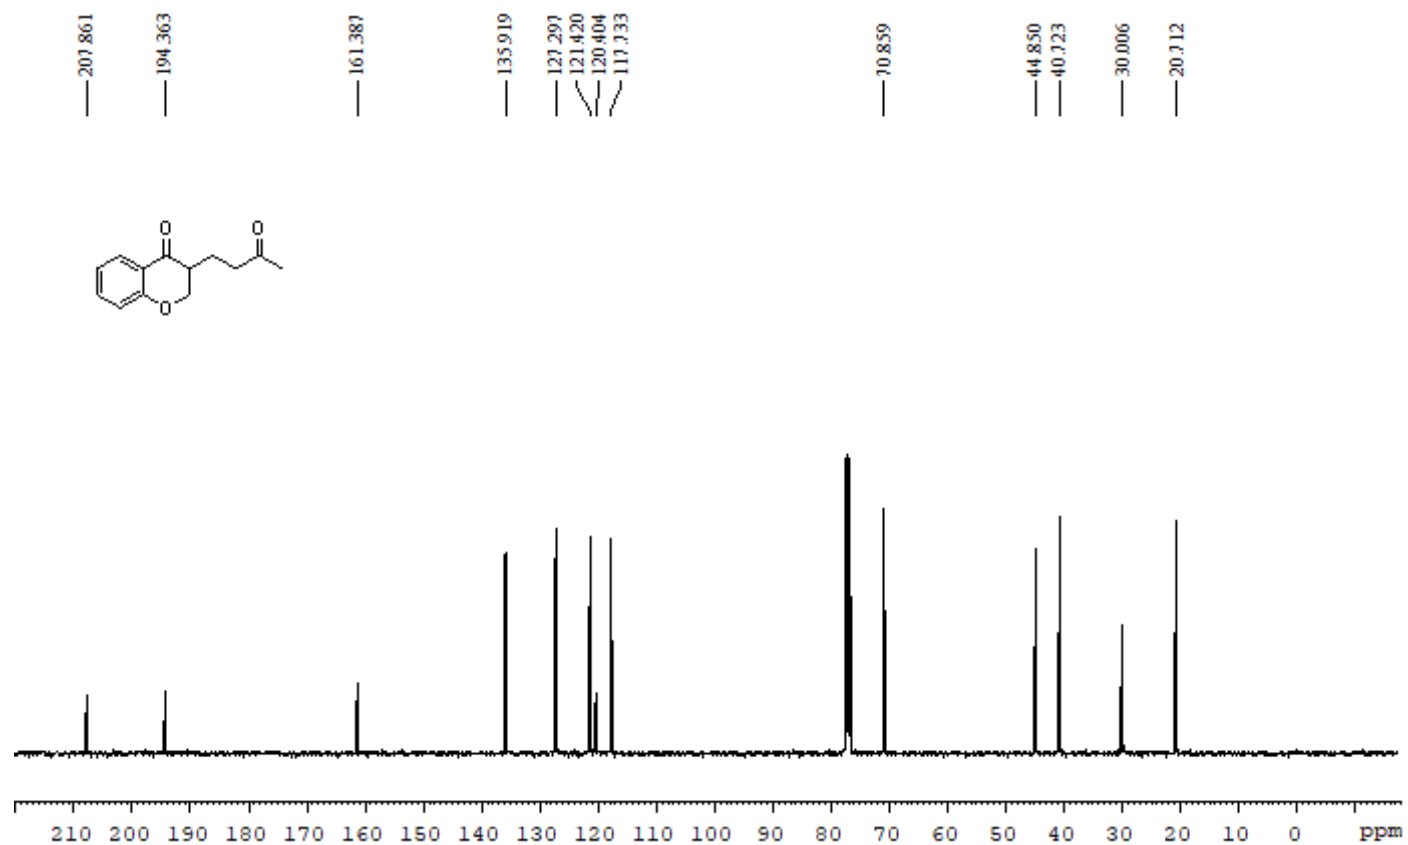

5b-<sup>1</sup>H

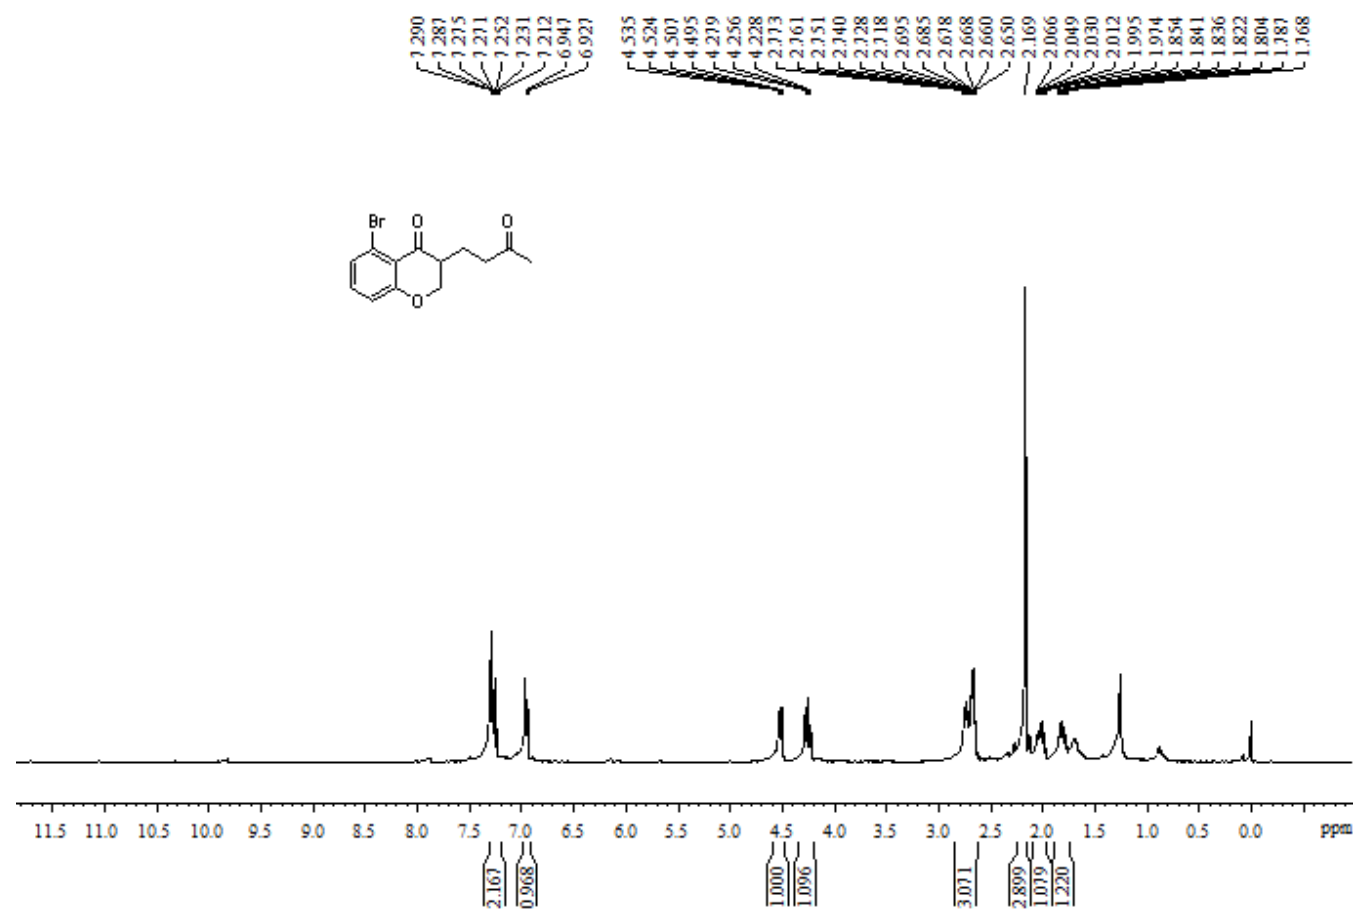

5b-<sup>13</sup>C

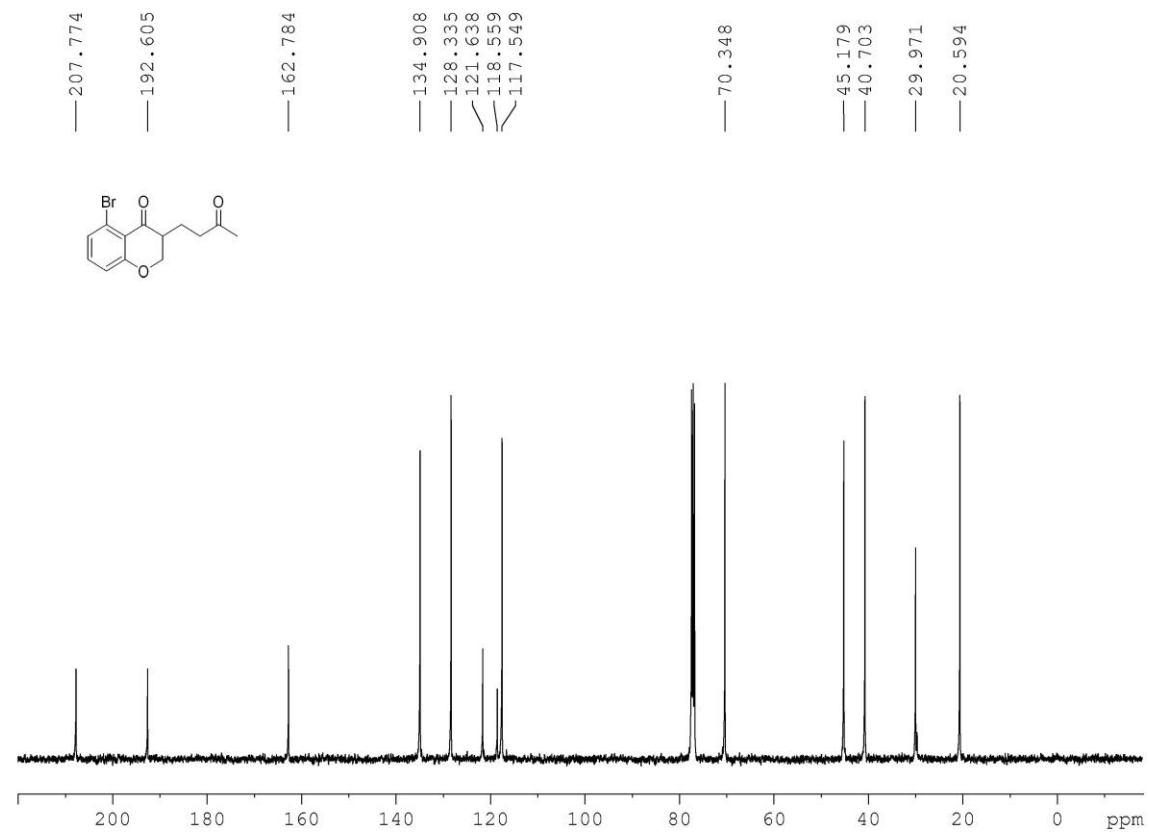

5c-<sup>1</sup>H

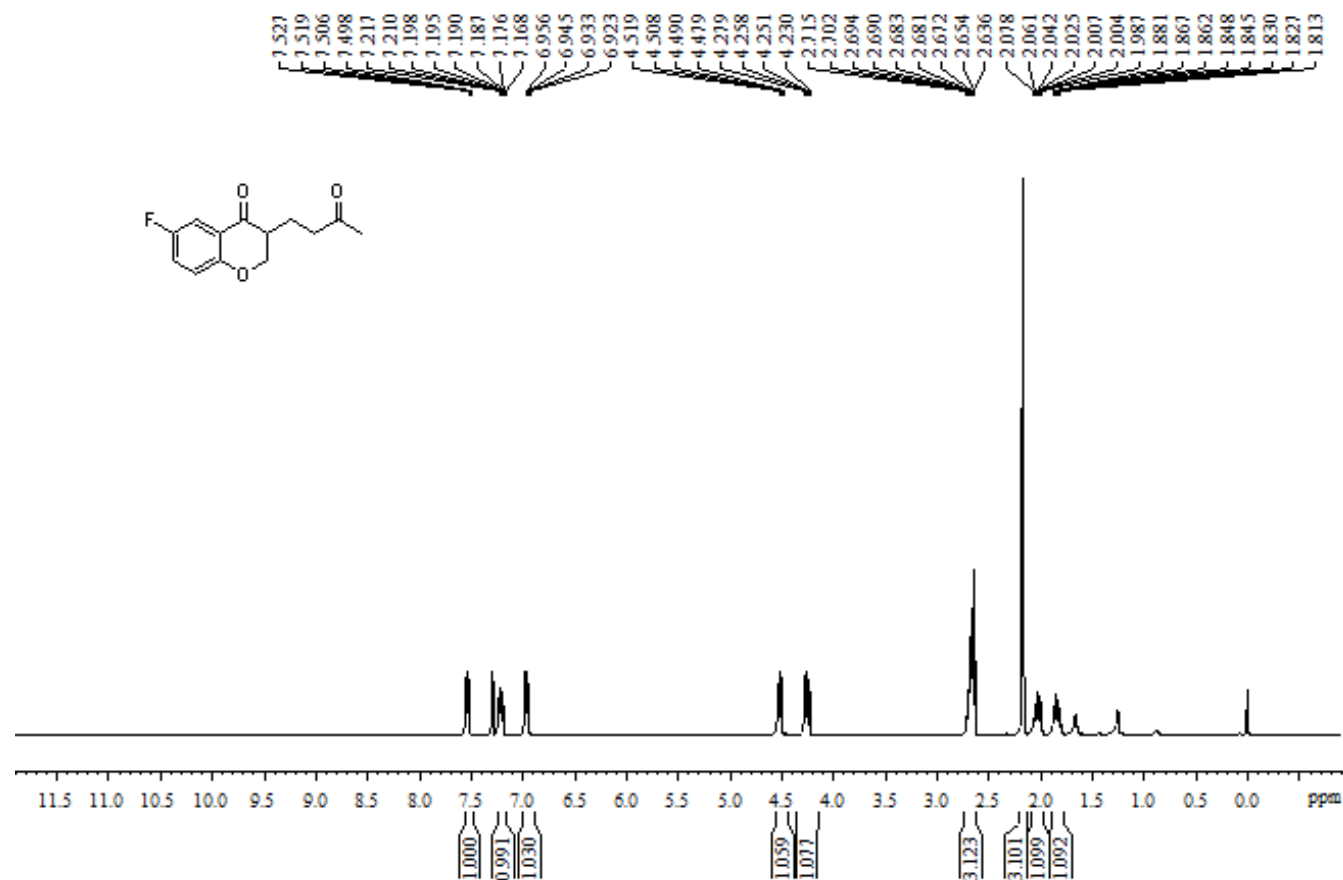

5c-<sup>13</sup>C

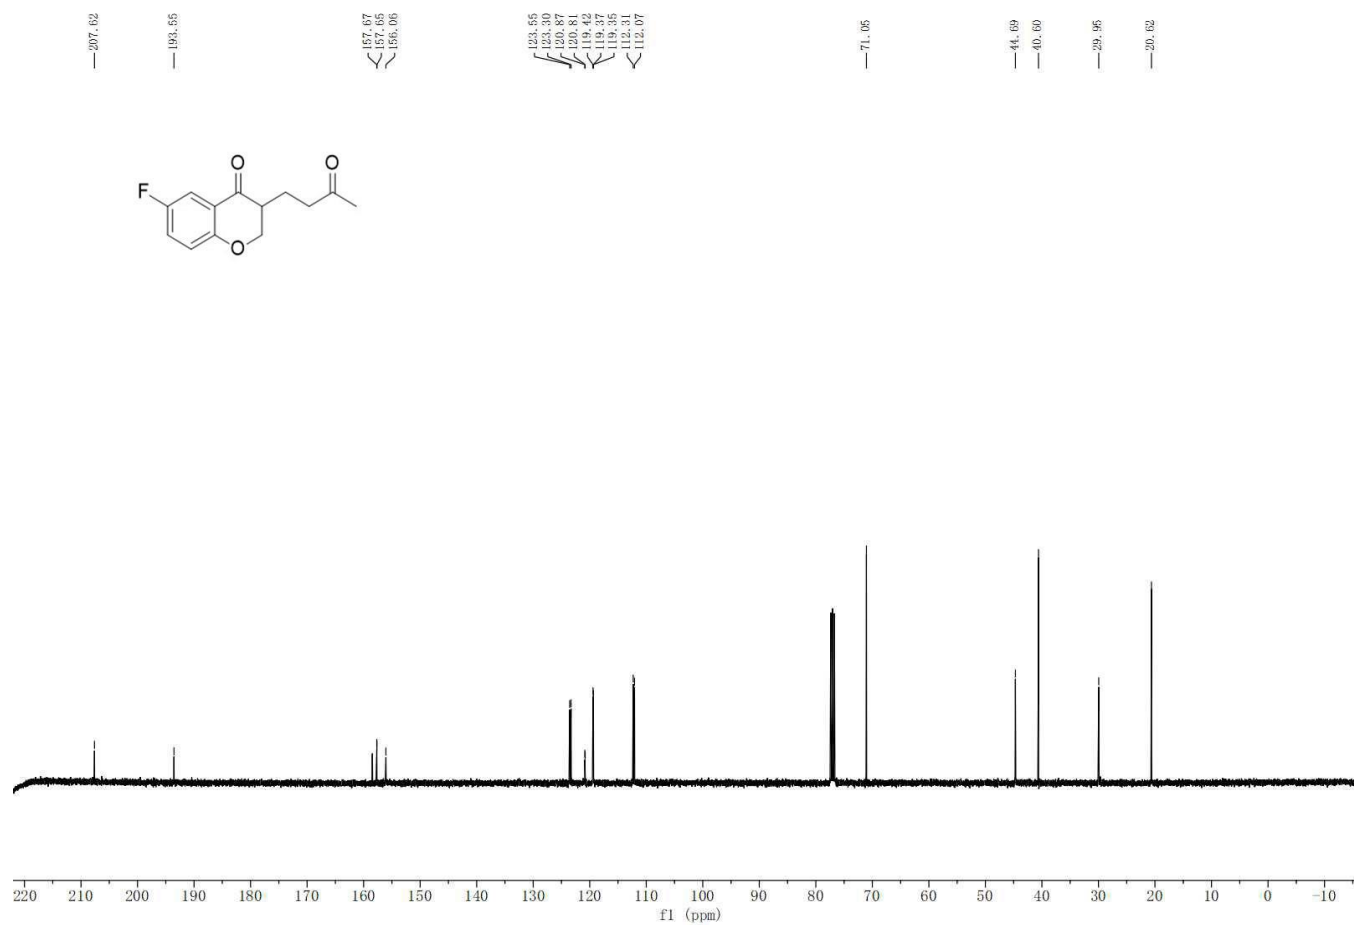

5c-<sup>19</sup>F

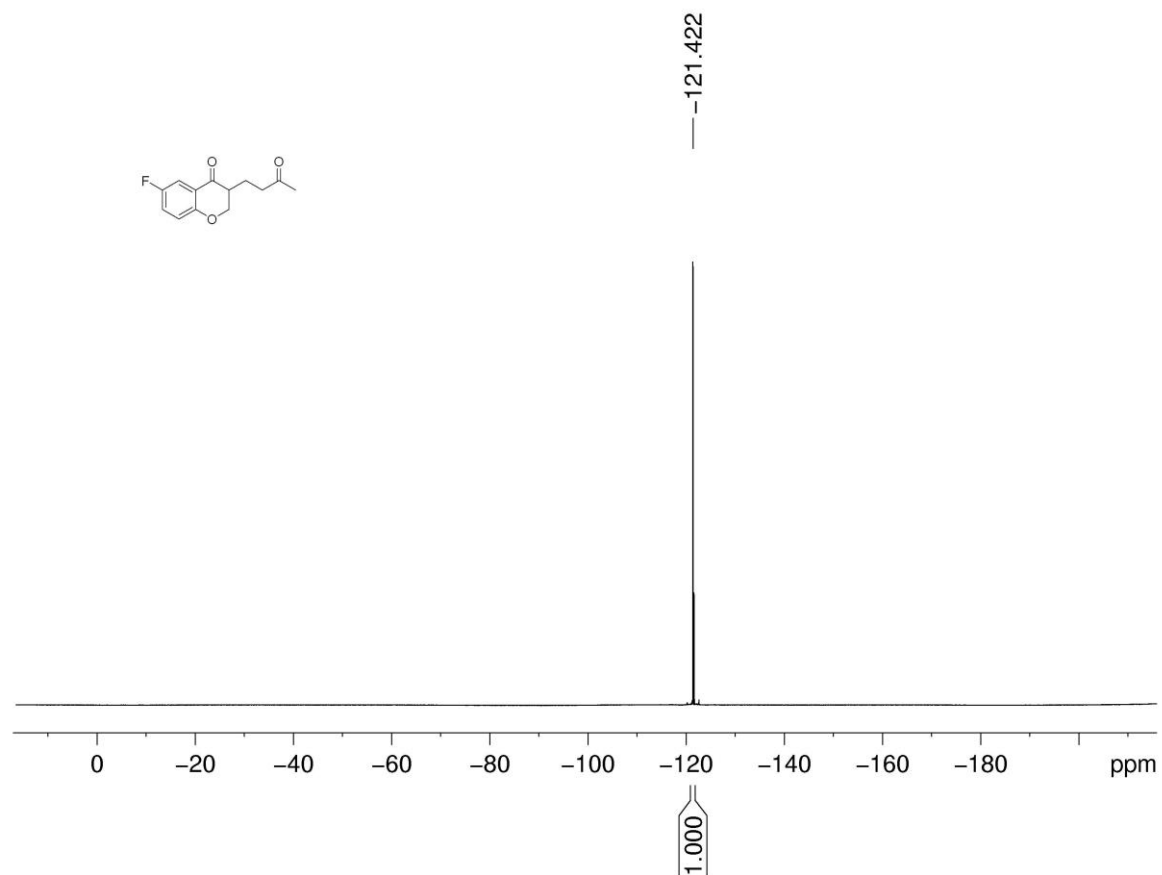

5d-<sup>1</sup>H

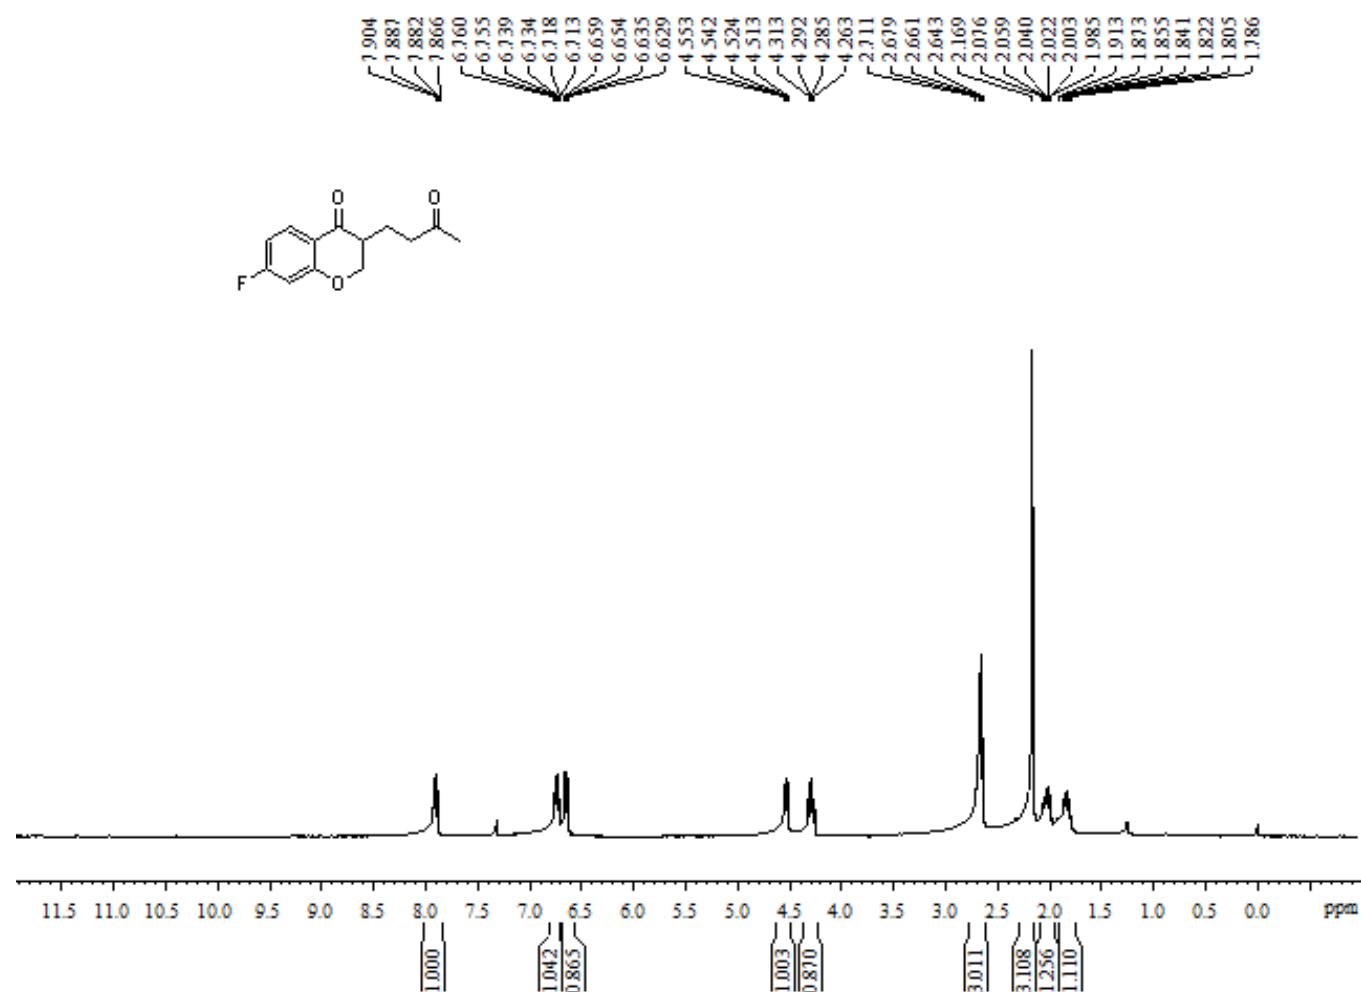

5d-<sup>13</sup>C

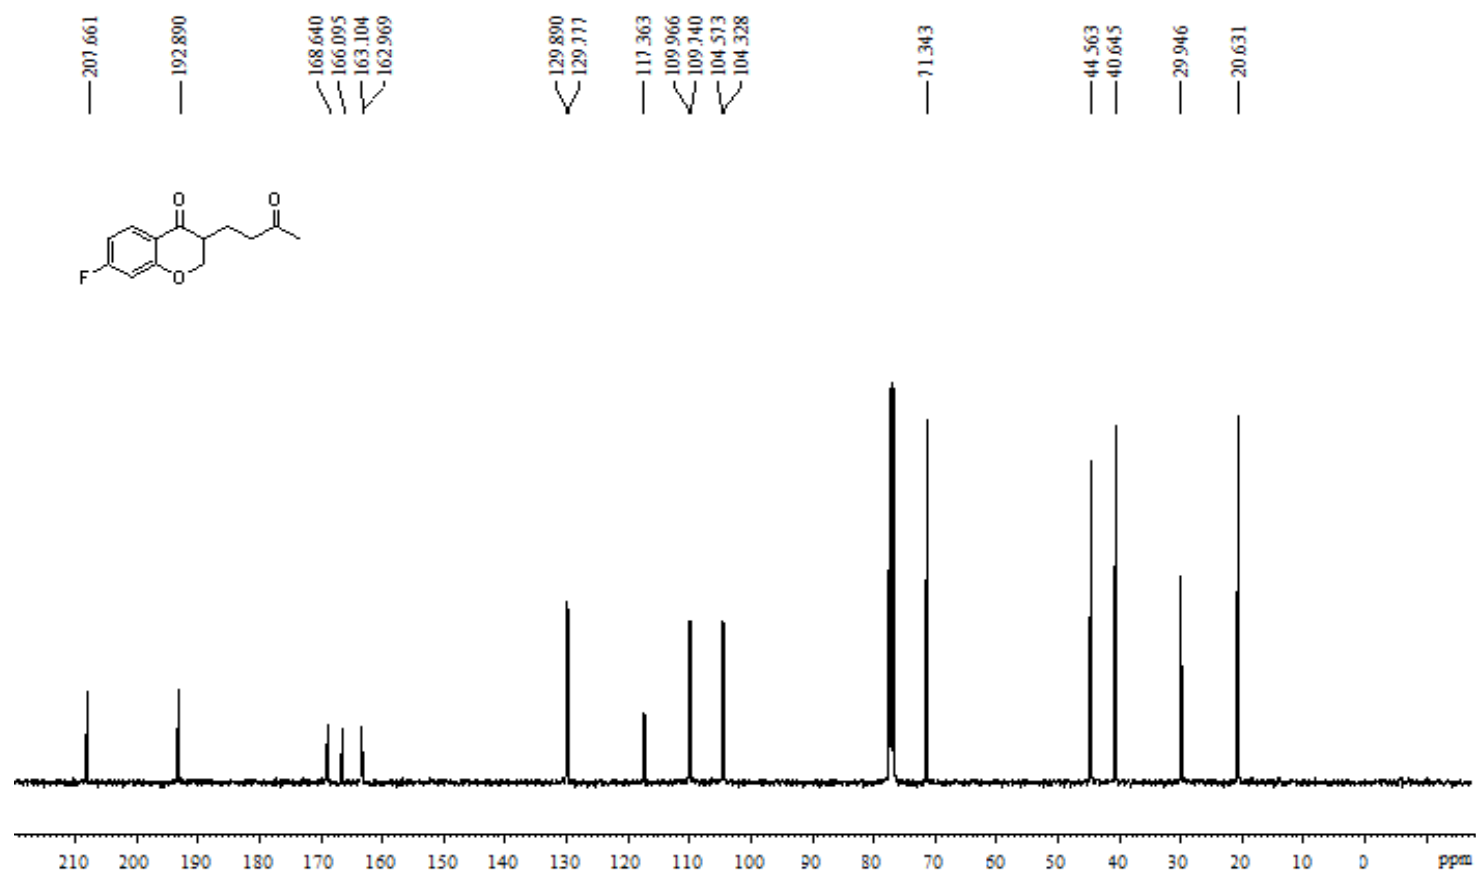



5d-<sup>19</sup>F

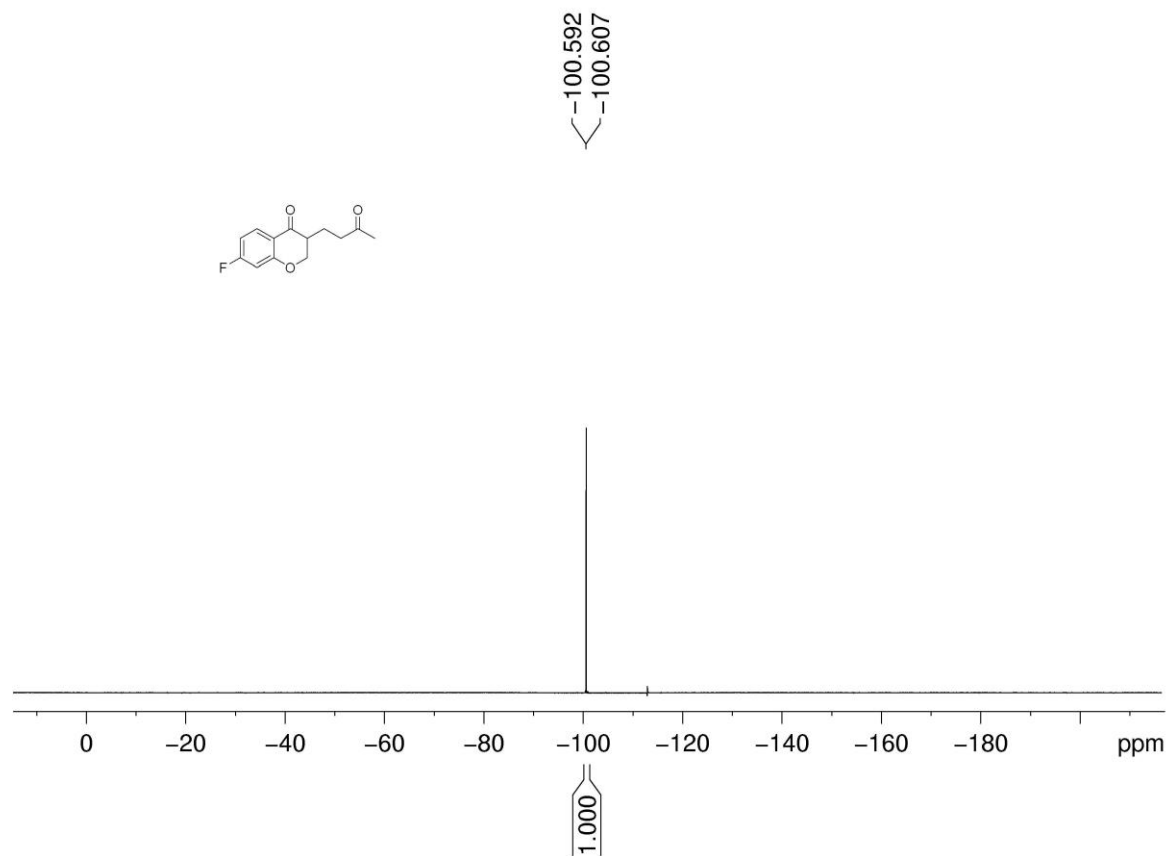

5e-<sup>1</sup>H

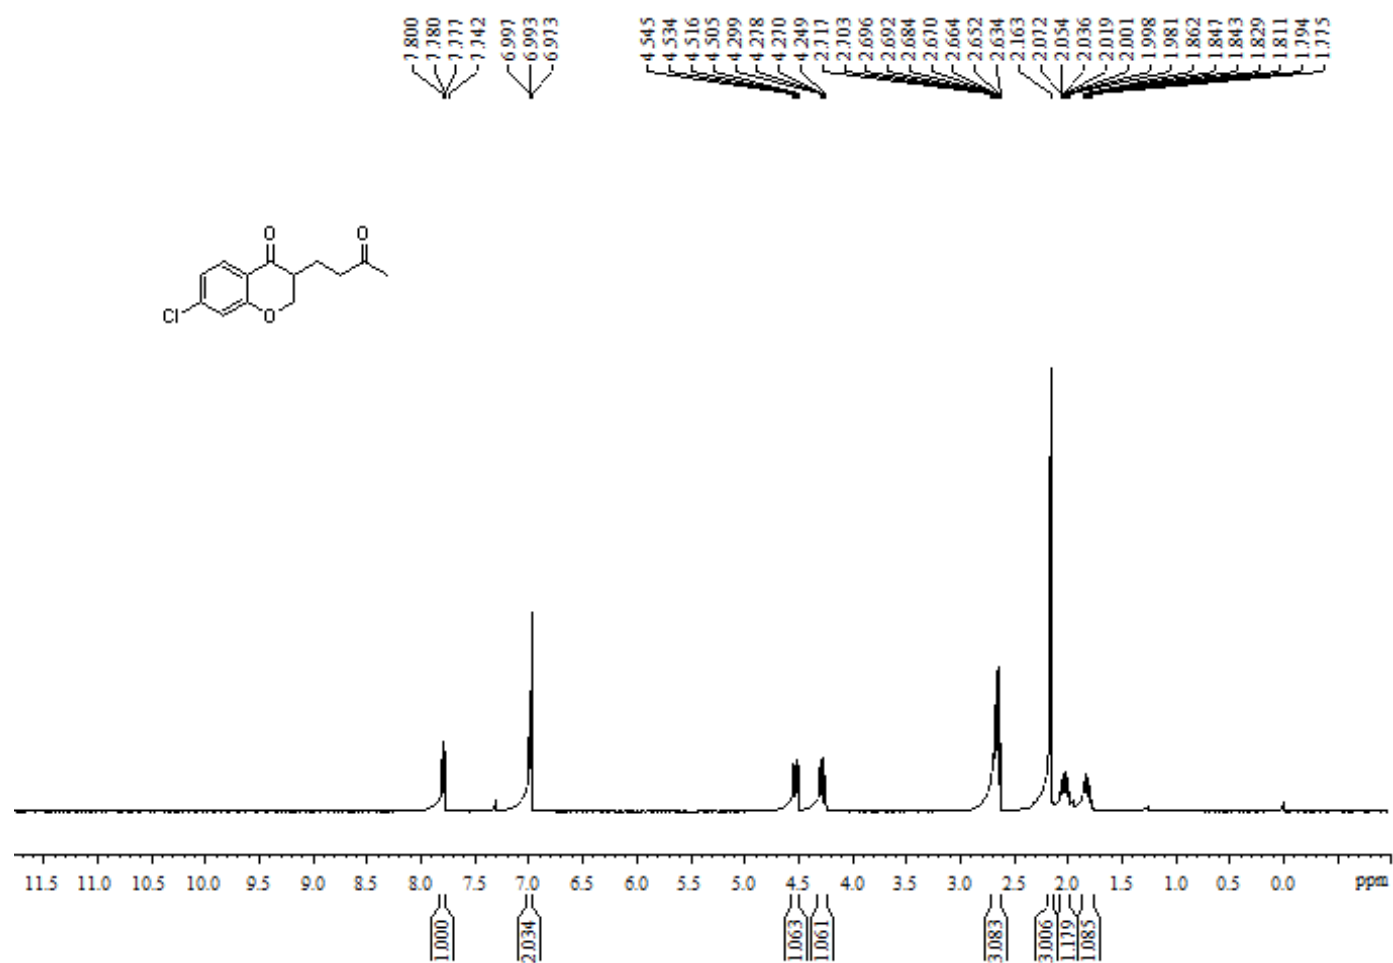

$5e^{-13}C$

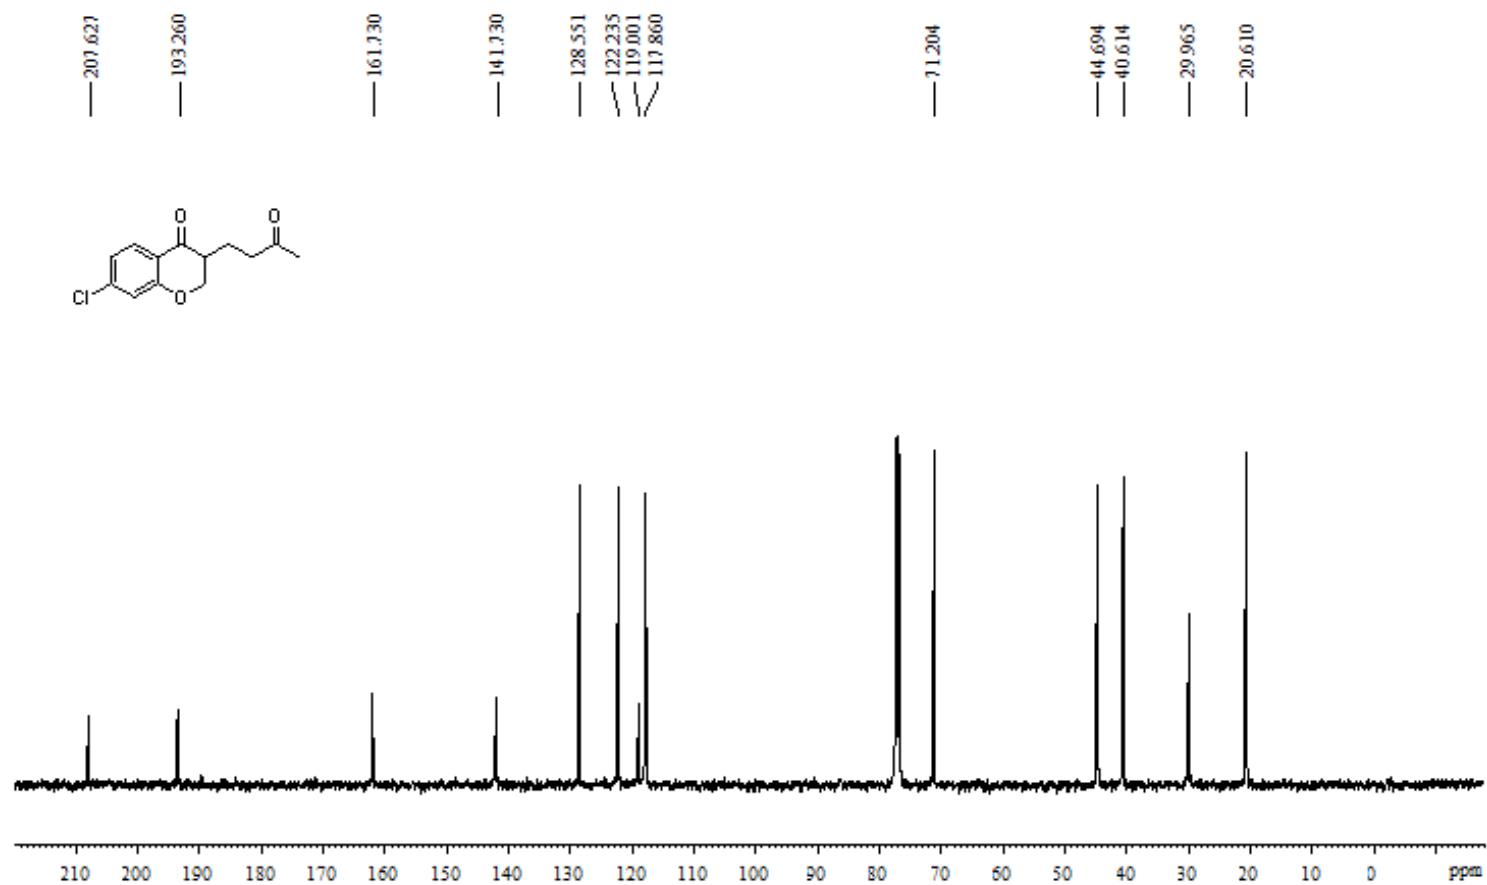

5f-<sup>1</sup>H

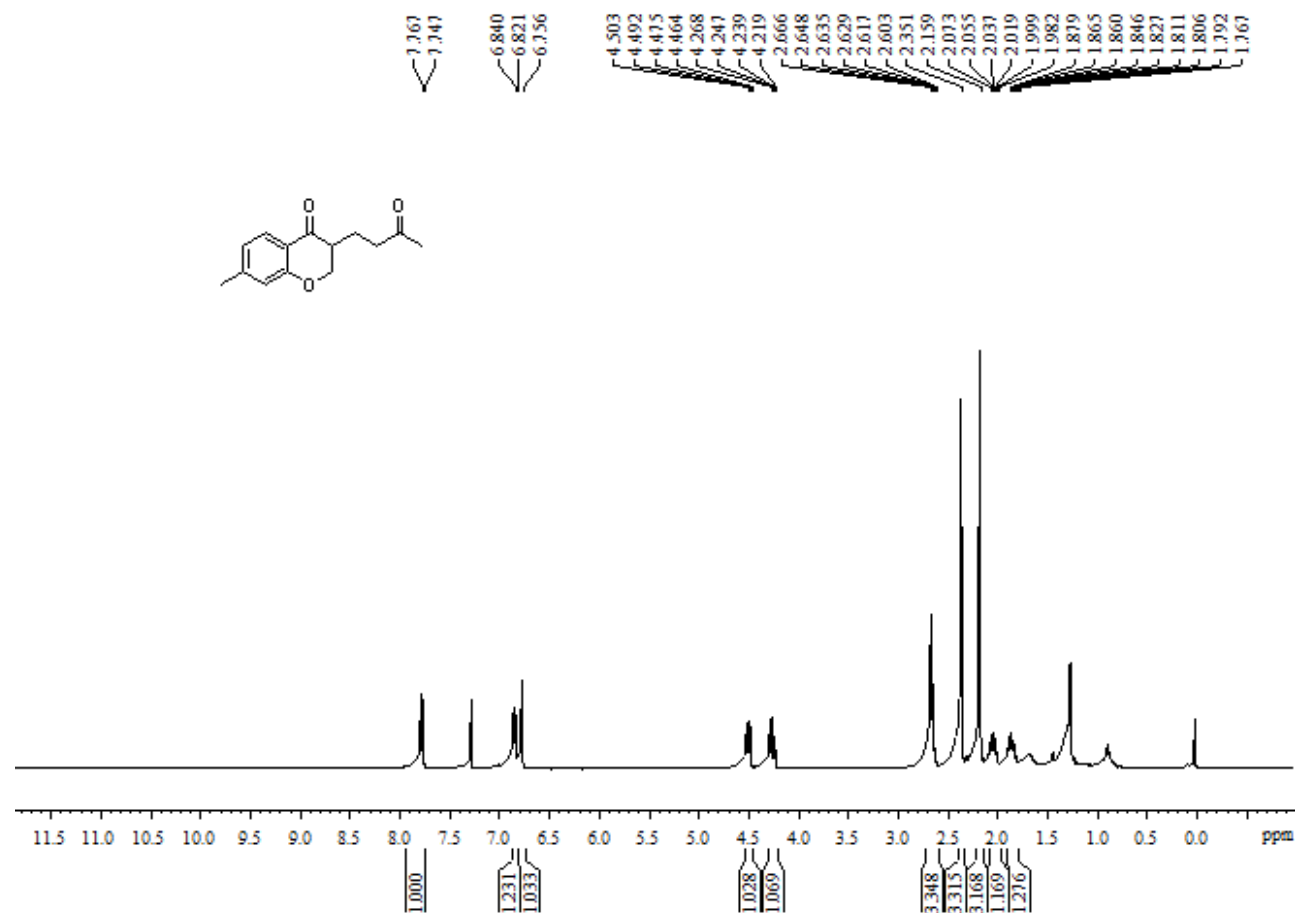

5f-<sup>13</sup>C

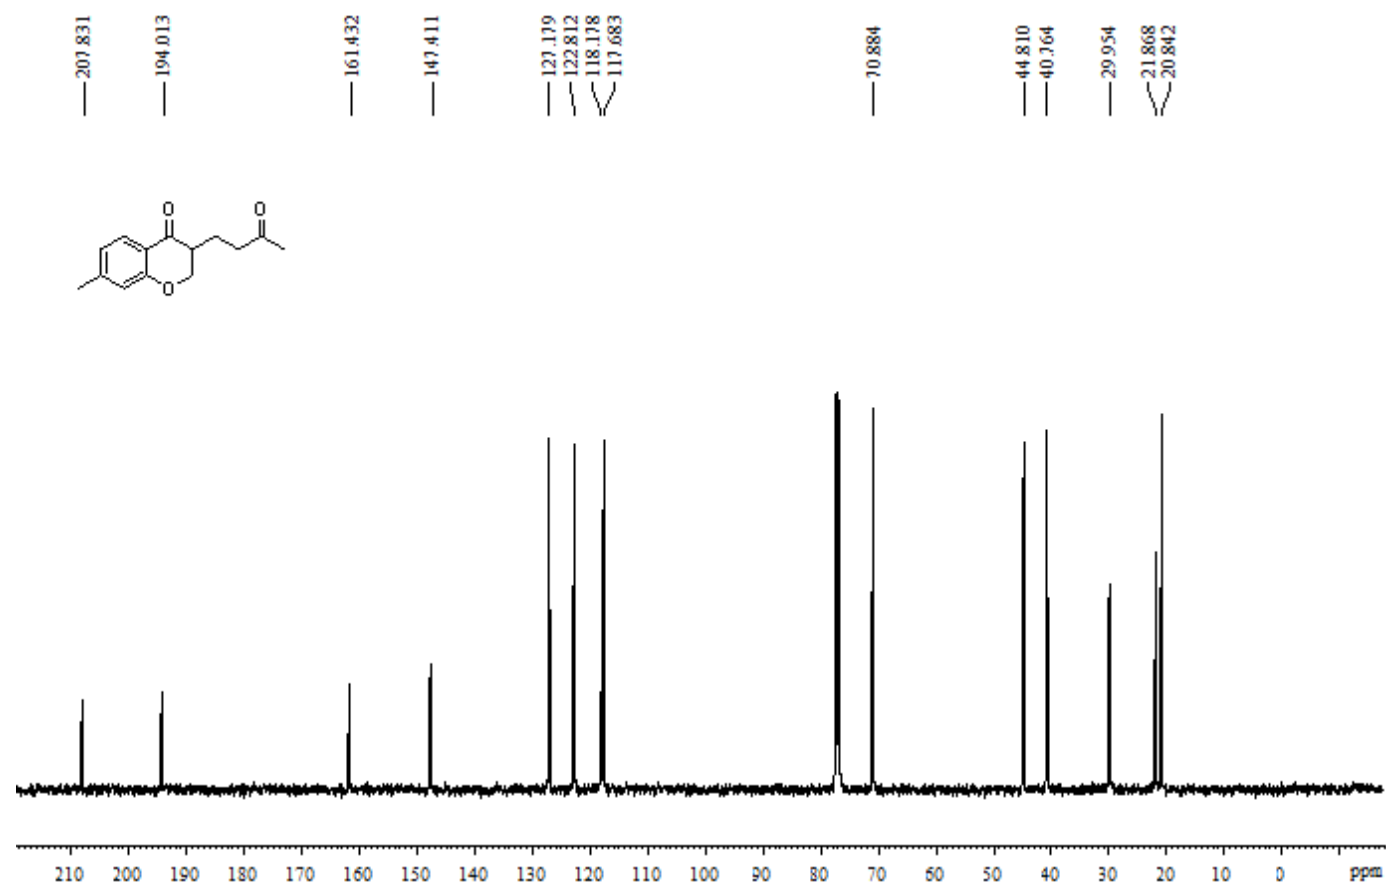

5ab-<sup>1</sup>H

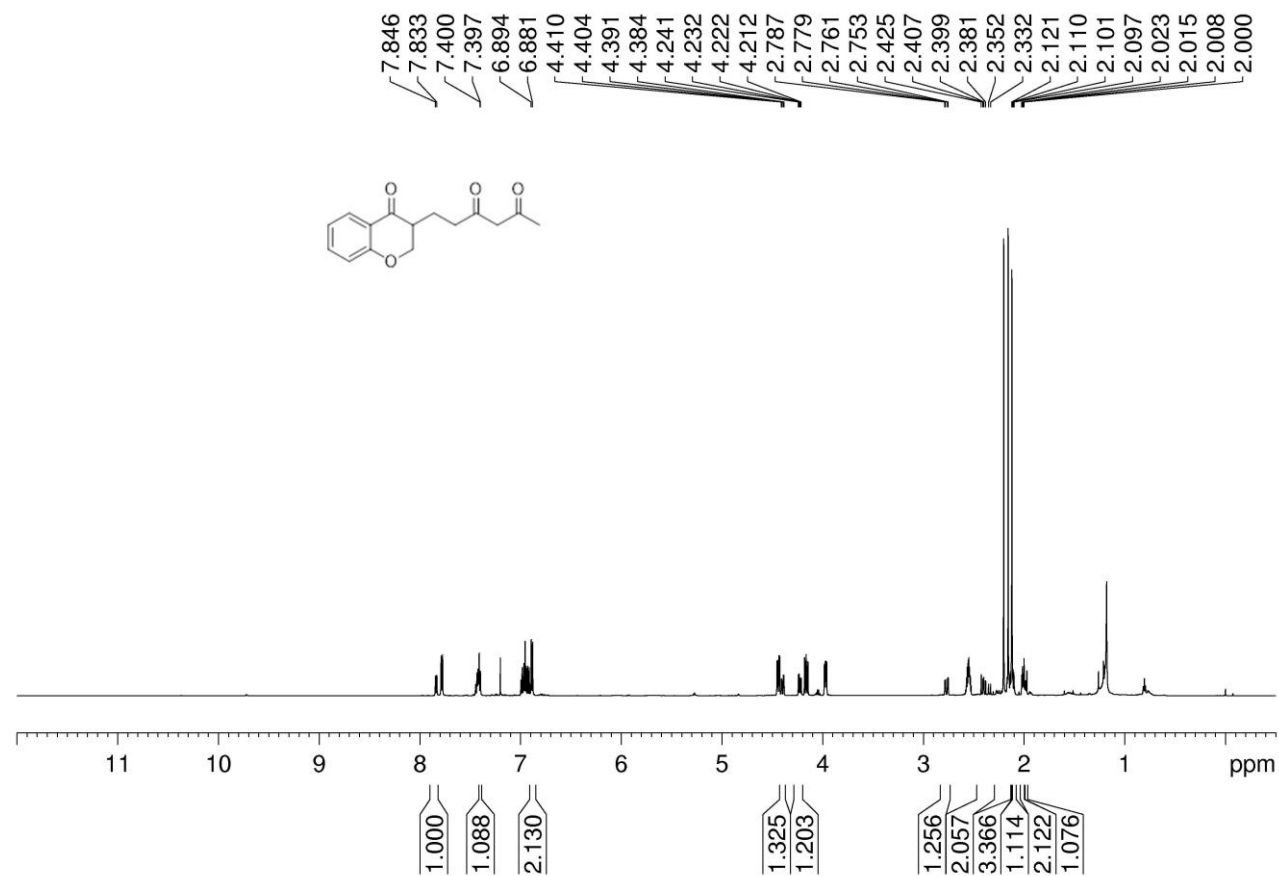

5ab-<sup>13</sup>C

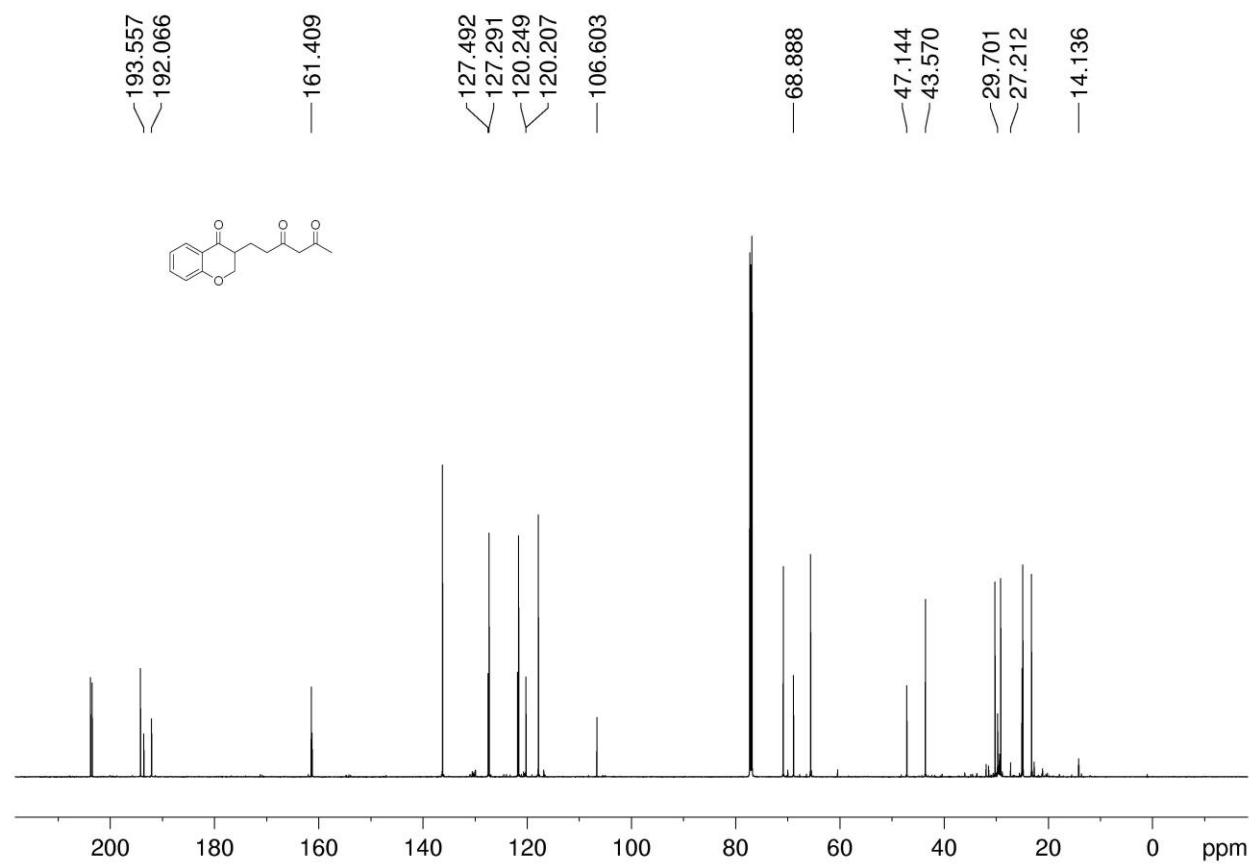

5ab'-<sup>1</sup>H

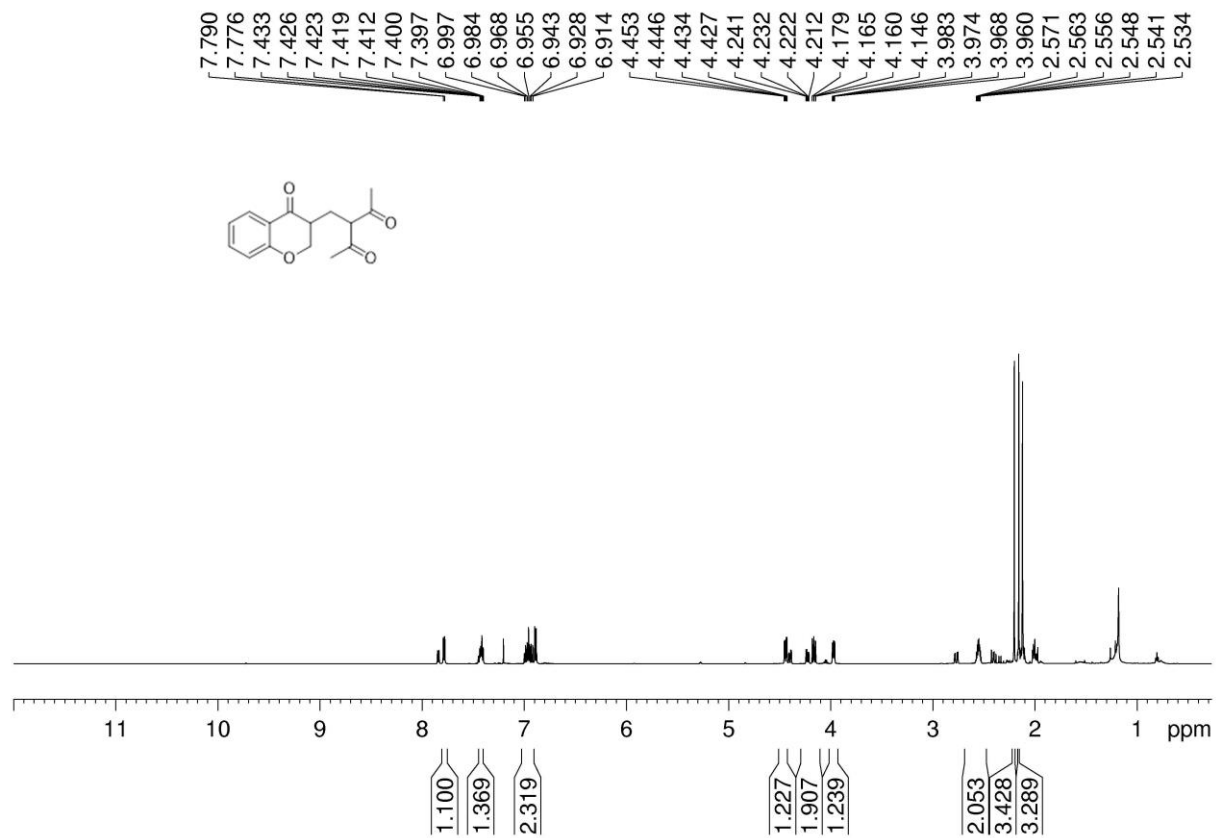



5ab'-<sup>13</sup>C

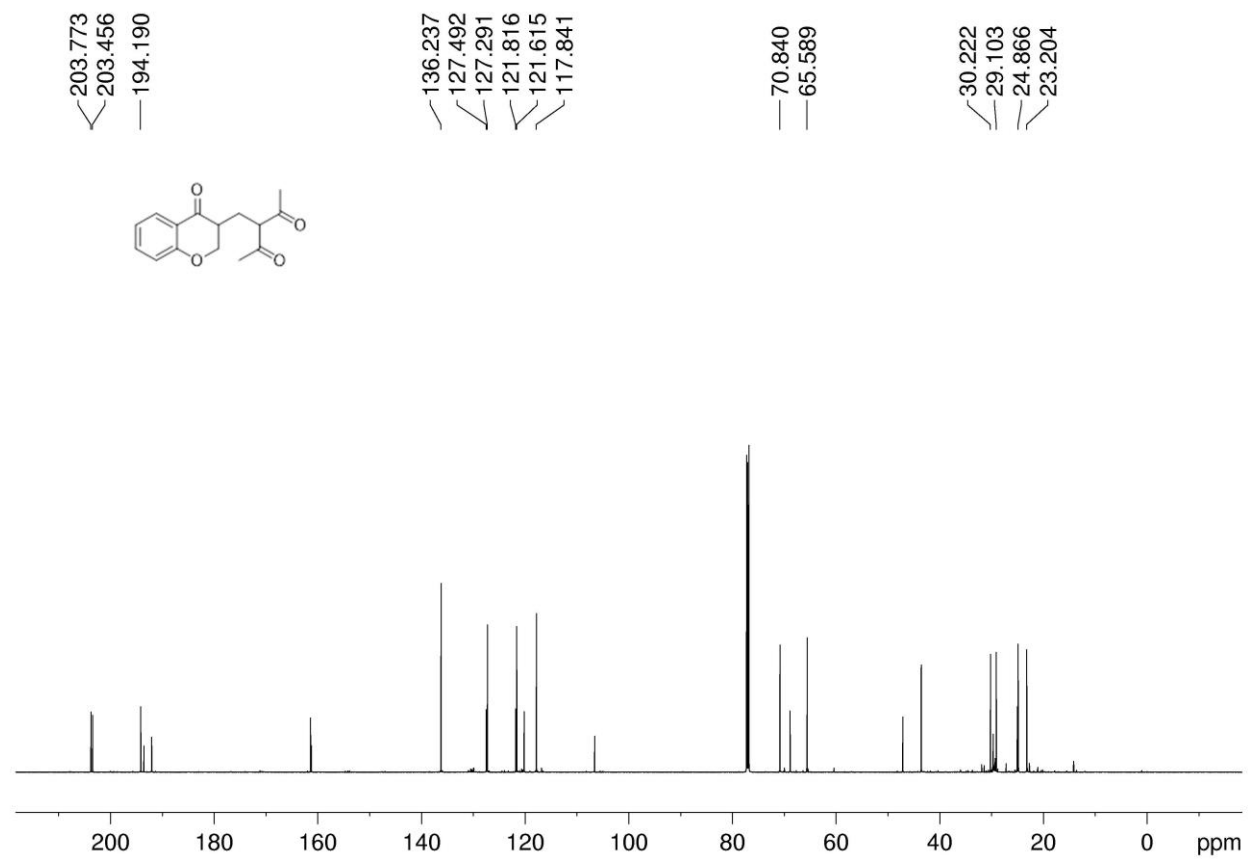

5ac-<sup>1</sup>H

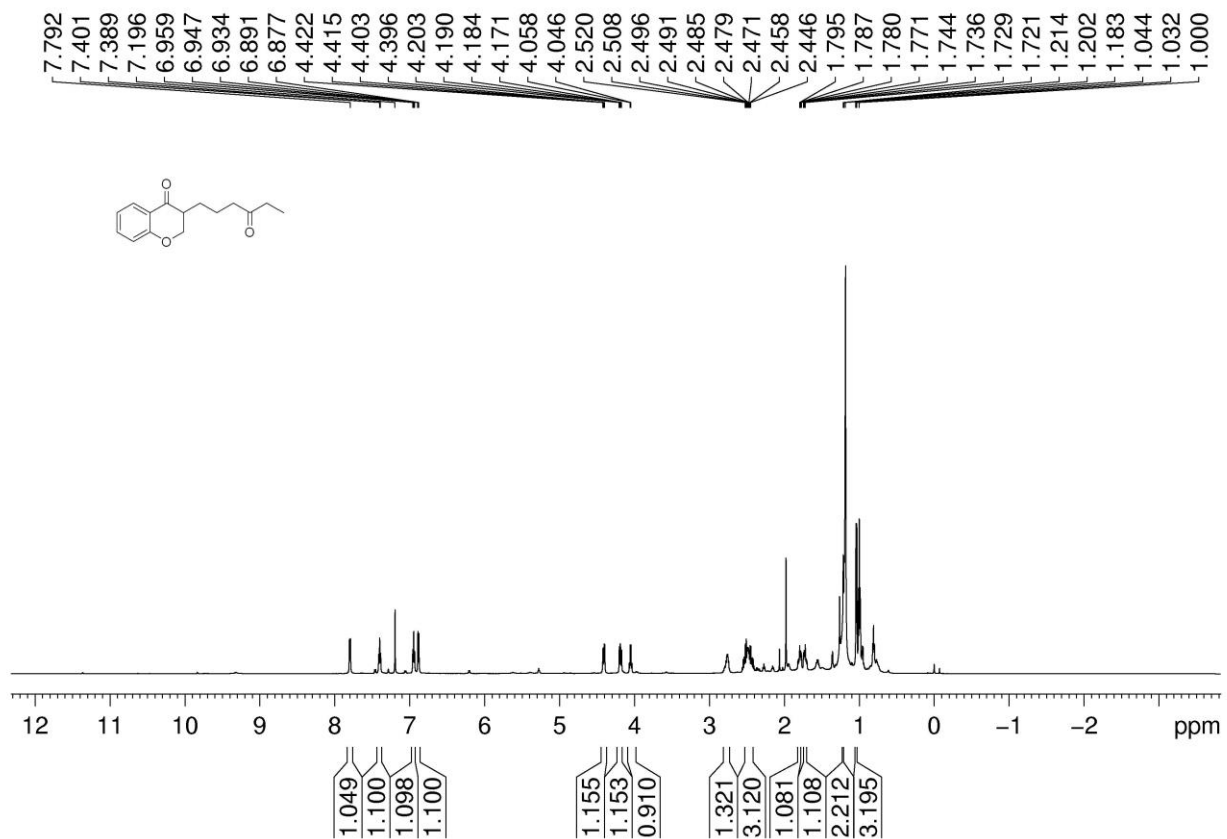

5ac-<sup>13</sup>C

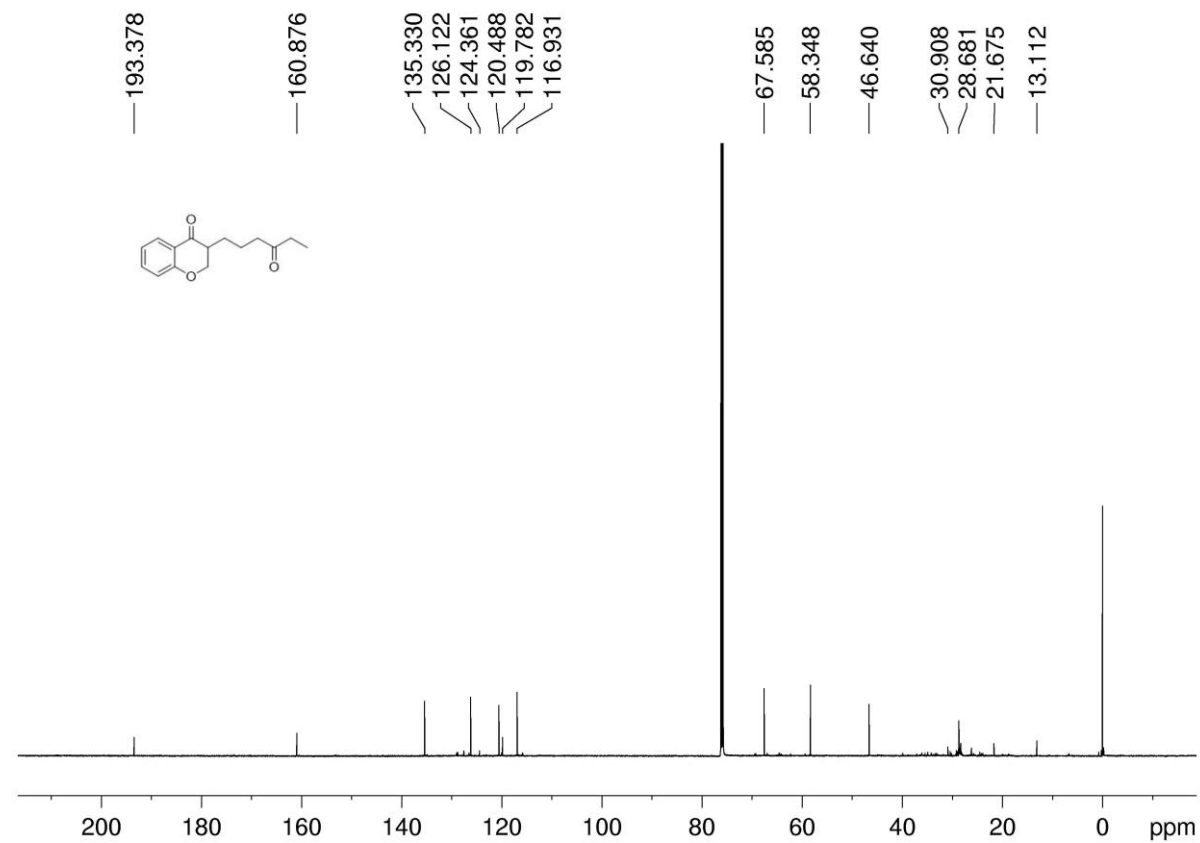

7-<sup>1</sup>H

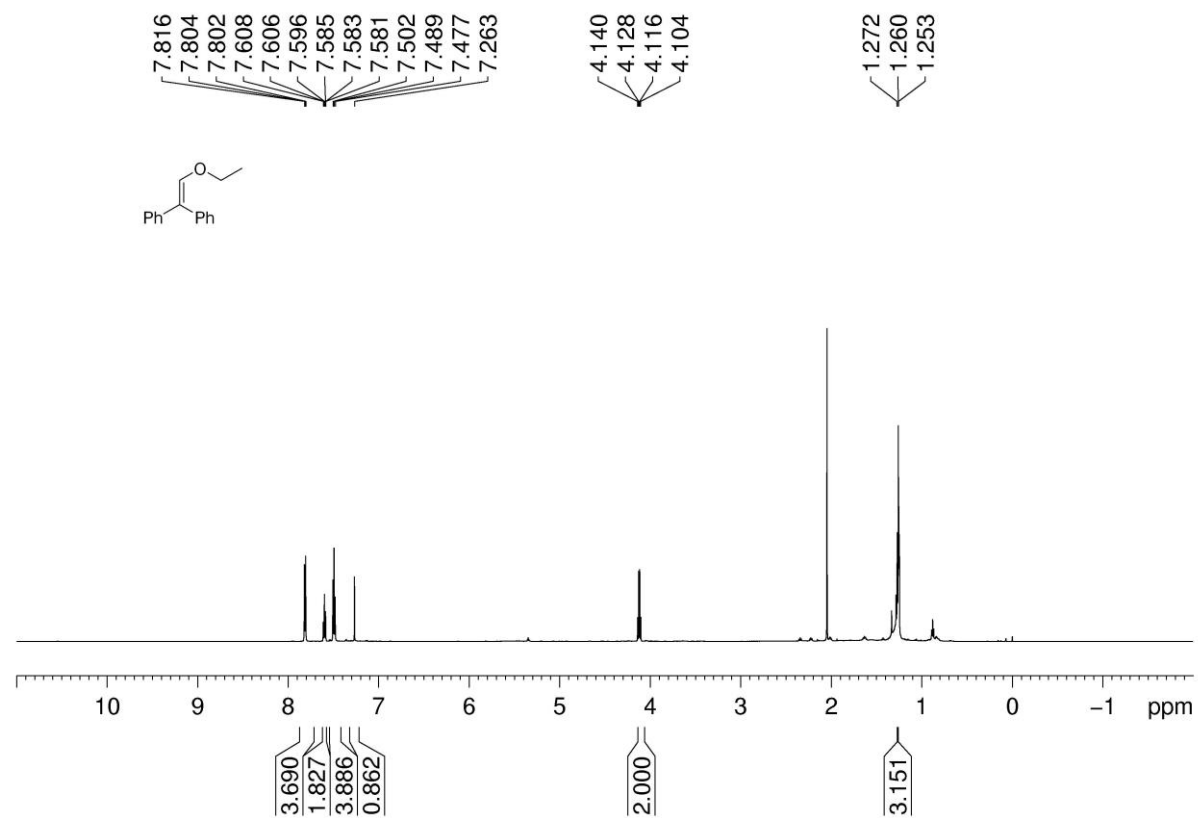

$7\text{-}^{13}\text{C}$

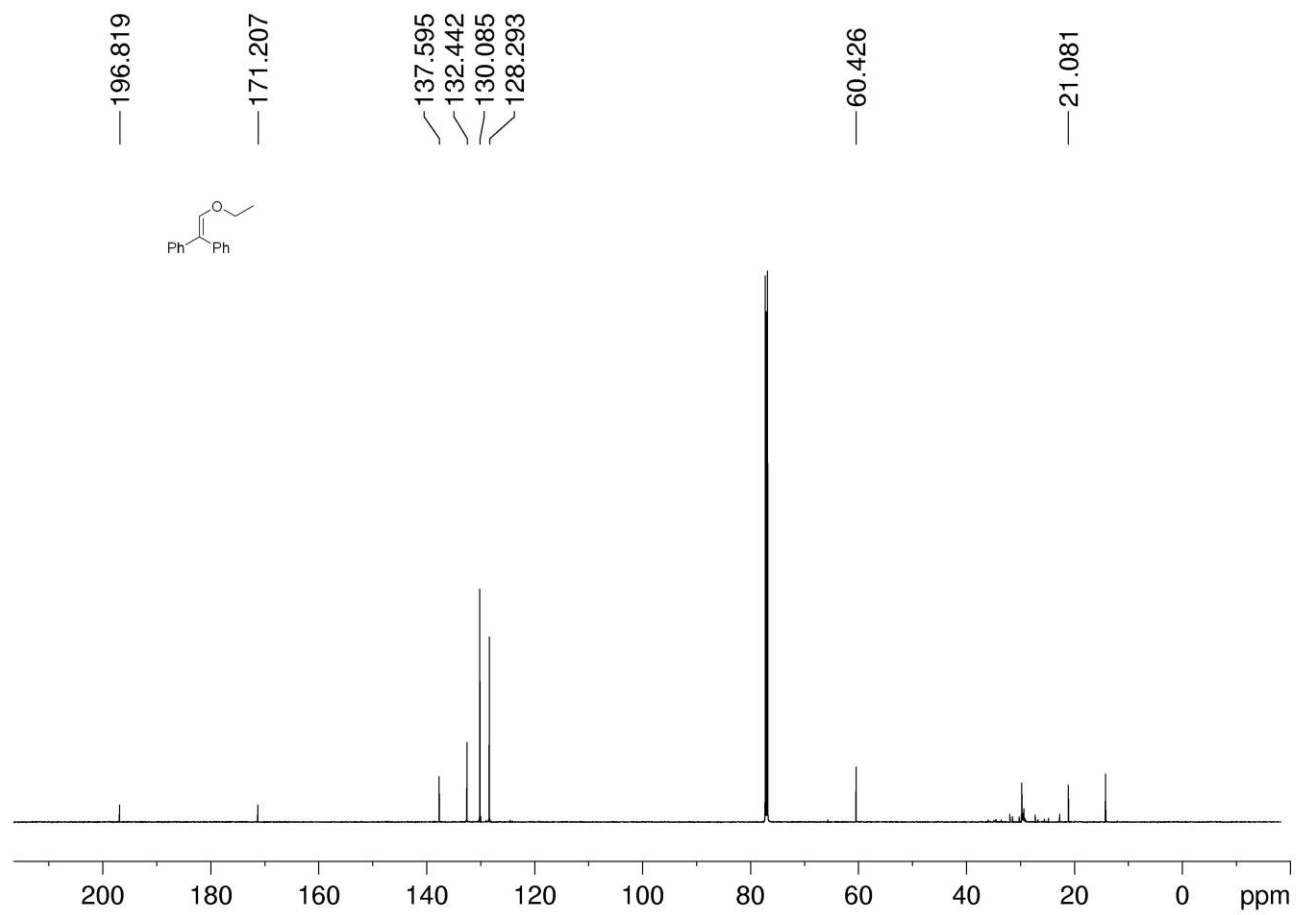

Supplement: d5ob01745a1.pdf [file d5ob01745a1.pdf]
